# Supplementary material for: Multi-atomic loaded C2N1 catalysts for CO2 reduction to CO or formic acid
Source: Royal Society of Chemistry journal article supplement (doi:10.1039/d4nr01082e), 2024-01-01
Supplement: d4nr01082e1.pdf [file d4nr01082e1.pdf]

## Supporting Information

### Multi-atomic Loaded C<sub>2</sub>N<sub>1</sub> Catalysts for CO<sub>2</sub> Reduction to CO or Formic Acid

Yimeng Sun <sup>a</sup>, Lin Tao <sup>a, \*</sup>, Mingjie Wu <sup>b, \*</sup>, Davoud Dastan <sup>c</sup>,  
Javed Rehman <sup>d</sup>, Lixiang Li <sup>a</sup>, and Baigang An <sup>a, \*</sup>

<sup>a</sup> *School of Chemical Engineering, University of Science and Technology  
Liaoning, Anshan 114051, China*

<sup>b</sup> *State Key Laboratory of New Textile Materials and Advanced Processing  
Technologies, Wuhan Textile University, Wuhan 430200, China*

<sup>c</sup> *Department of Materials Science and Engineering, Cornell University, Ithaca,  
NY 14850, United States*

<sup>d</sup> *State Key Laboratory of Metastable Materials Science and Technology,  
Yanshan University, Qinhuangdao 066004, China*

#### **\*Corresponding authors at:**

School of Chemical Engineering, University of Science and Technology  
Liaoning, Anshan 114051, China

*E-mail addresses:* [taolin@ustl.edu.cn](mailto:taolin@ustl.edu.cn) (L. Tao),

*E-mail addresses:* [bgan@ustl.edu.cn](mailto:bgan@ustl.edu.cn) (B. An)

State Key Laboratory of New Textile Materials and Advanced Processing  
Technologies, Wuhan Textile University, Wuhan 430200, China

*E-mail addresses:* [mjwu@wtu.edu.cn](mailto:mjwu@wtu.edu.cn) (M. Wu)

## Contents

|                                                                                                                                                          |
|----------------------------------------------------------------------------------------------------------------------------------------------------------|
| <b>Computational section</b>                                                                                                                             |
| <b>Figure S1.</b> Optimized structure of 1TM-C <sub>2</sub> N <sub>1</sub> .                                                                             |
| <b>Figure S2.</b> Optimized structure of 2TM-C <sub>2</sub> N <sub>1</sub> .                                                                             |
| <b>Figure S3.</b> Optimized structure of 3TM-C <sub>2</sub> N <sub>1</sub> .                                                                             |
| <b>Figure S4.</b> Optimized structure of 4TM-C <sub>2</sub> N <sub>1</sub> .                                                                             |
| <b>Figure S5.</b> Density of states and charge density of 1TM-C <sub>2</sub> N <sub>1</sub> .                                                            |
| <b>Figure S6.</b> Density of states and charge density of 2TM-C <sub>2</sub> N <sub>1</sub> .                                                            |
| <b>Figure S7.</b> Density of states and charge density of 3TM-C <sub>2</sub> N <sub>1</sub> .                                                            |
| <b>Figure S8.</b> Density of states and charge density of 4TM-C <sub>2</sub> N <sub>1</sub> .                                                            |
| <b>Figure S9-S12.</b> The <i>ab initio</i> molecular dynamics of CO <sub>2</sub> on TM-C <sub>2</sub> N <sub>1</sub> .                                   |
| <b>Figure S13.</b> Charge density of CO <sub>2</sub> on TM-C <sub>2</sub> N <sub>1</sub> .                                                               |
| <b>Figure S14-S17.</b> The density of states of TM-C <sub>2</sub> N <sub>1</sub> -CO <sub>2</sub> .                                                      |
| <b>Figure S18.</b> Free energy change of the first protonation step in the CO <sub>2</sub> RR and HER.                                                   |
| <b>Figure S19-S22.</b> The initial and the final stable configurations of CO <sub>2</sub> on the TM-C <sub>2</sub> N <sub>1</sub> .                      |
| <b>Figure S23.</b> Gibbs free energy distribution diagram of CO <sub>2</sub> reduction pathway toward CO or HCOOH on 1TM-C <sub>2</sub> N <sub>1</sub> . |
| <b>Figure S24.</b> Gibbs free energy distribution diagram of CO <sub>2</sub> reduction pathway toward CO or HCOOH on 2TM-C <sub>2</sub> N <sub>1</sub> . |
| <b>Figure S25.</b> Gibbs free energy distribution diagram of CO <sub>2</sub> reduction pathway toward CO or HCOOH on 4TM-C <sub>2</sub> N <sub>1</sub> . |
| <b>Figure S26.</b> The limiting potential of CO or HCOOH on TM-C <sub>2</sub> N <sub>1</sub> .                                                           |
| <b>Figure S27.</b> Overpotential of CO or HCOOH on TM-C <sub>2</sub> N <sub>1</sub> .                                                                    |
| <b>Figure S28.</b> ICOHP value of *COOH and *OCHO on the 3TM-C <sub>2</sub> N <sub>1</sub> .                                                             |
| <b>Figure S29.</b> The stable structure, charge density and DOS of (a) *COOH and (b) *OCHO on 3Mo-C <sub>2</sub> N <sub>1</sub> .                        |
| <b>Figure S30.</b> The stable structure, charge density and DOS of (a) *OCHO and (b) *COOH on 3Ti-C <sub>2</sub> N <sub>1</sub> .                        |

**Table S1.** The adsorption energies ( $E_{\text{ads}}$ ), bond lengths of C and O atoms in  $\text{CO}_2$  ( $d_{\text{C-O}}$ ), O-C-O angles of the most stable  $\text{CO}_2$  adsorption configurations on  $\text{TM-C}_2\text{N}_1$ .

**Table S2.** The adsorption energy of  $\text{H}_2\text{O}$  on the  $\text{TM-C}_2\text{N}_1$ .

**Table S3.** Diffusion coefficient of  $\text{CO}_2$  on  $\text{TM-C}_2\text{N}_1$ .

**References**

## Computational methods

Based on density functional theory (DFT) with periodic boundary conditions, all tasks in this work are calculated in Dmol<sup>3</sup> code [1, 2]. In the calculation process, C-2s<sup>2</sup>2p<sup>2</sup>, N-2s<sup>2</sup>2p<sup>3</sup>, O-2s<sup>2</sup>2p<sup>4</sup>, H-1s<sup>1</sup>, and Mn-3d<sup>6</sup>4s<sup>1</sup>, Mo-4d<sup>5</sup>5s<sup>1</sup>, Ru-4d<sup>7</sup>5s<sup>1</sup>, Ti-3d<sup>3</sup>4s<sup>1</sup> electron orbitals are used as valence electrons, and the interaction between valence electrons and core electrons is described by projector augmented wave method, and generalized gradient approximation The Perdew-Burke-Ernzerhof functional, gradient approximation method correlation describes the exchange association function [3]. To make the result of the total energy more precise, spin polarization is turned on in the calculation and DFT correction is applied. The convergence criteria for energy and force are 10<sup>-4</sup> eV and 0.05 eV/Å, respectively. When the structure is optimized, the K space is meshed 3 × 3 × 1 with gamma-centered. During the calculation, all atoms in the structure are relaxed.

### Catalytic performance calculation method

The computational hydrogen electrode (CHE) model [4, 5] was used to calculate the electrochemical potential of proton-electron pairs and hydrogen under standard conditions:

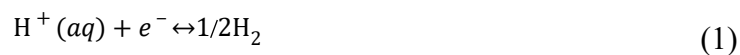

According to this method, the Gibbs free energy change value for each basic reaction is calculated as follows [6]:

$$\Delta G = \Delta E + \Delta E_{\text{ZPE}} - T\Delta S \quad (2)$$

Among them,  $\Delta E$  is the energy difference calculated by DFT,  $\Delta E_{\text{ZPE}}$  is the change in zero-point energy,  $T$  is the temperature (298.15 K), and  $\Delta S$  is the change in entropy. The adsorption energy can determine the stability of  $\text{CO}_2$  adsorption on the surface of the catalyst. The adsorption energy formula is as follows [6]:

$$\Delta E_{\text{ads}} = E_{\text{system}} - (E_{\text{surf}} + E_{\text{CO}_2}) \quad (3)$$

where  $E_{\text{system}}$  is the total energy,  $E_{\text{surf}}$  and  $E_{\text{CO}_2}$  represent the energy of the surface model and the molecule, respectively. In general, the adsorption energy is negative, indicating that the adsorption process is an exothermic reaction and the adsorption system is stable.

**Mechanism analysis calculation details**

The mechanism of CO<sub>2</sub> adsorption on the surface of the catalyst can be elaborated by the d-band center theory, and the formula for calculating the d-band center is as follows [7]:

$$\varepsilon_d = \frac{\int_{-\infty}^{\infty} n_d(\varepsilon) \varepsilon d\varepsilon}{\int_{-\infty}^{\infty} n_d(\varepsilon) d\varepsilon} \quad (4)$$

where  $n_d(\varepsilon)$  is the density of electrons on the corresponding d band and  $\varepsilon$  is the energy. In addition, the limiting potential ( $U_L$ ) is the minimum negative potential that enables heat release for each fundamental step. The formula is

$$U_L = -\Delta G_{max}/e \quad (5)$$

where  $\Delta G_{max}$  is the maximum value of the change in free energy over the entire CO<sub>2</sub>RR path, and  $e$  is the amount of electron power [8].

### Details of diffusion performance calculation

All MD simulations were carried in a constant number, a constant volume and a constant temperature (NVT) ensemble. The temperature was controlled by using the Nose thermostat. The initial velocity of gas molecules was identical to Boltzmann distribution according to the assumption that the time average is equivalent to the ensemble average. Each MD simulation had a calculation process of  $5 \times 10^5$  steps. The time step and total simulation time were set to 10 fs and 5 ns, respectively. The first 2 ns was used for equilibration and the last 3 ns of the MD simulation was used for data analysis. Full trajectory was recorded and the frames were output every 500 steps. The diffusion activation energy can be obtained by calculating the gas motion parameters according to molecular dynamics simulation based on our previous work [9], and by this means, the diffusion of  $\text{CO}_2$  on a  $\text{TM-C}_2\text{N}_1$  surface can be well verified. Therefore, the mean-squared displacement (MSD) and diffusion coefficients (Ds) were used to investigate the diffusion properties of gases according to the Einstein diffusion law [10], these quantities were computed by the following equations:

$$MSD(t) = \frac{1}{N} \sum_{i=1}^N \langle |r_i(t) - r_i(0)|^2 \rangle \quad (6)$$

$$D_s = \frac{1}{6} \lim_{t \rightarrow \infty} \frac{d}{dt} \sum_i^n \langle |r_i(t) - r_i(0)|^2 \rangle \quad (7)$$

where  $N$  is the number of molecules,  $r_i(t)$  is the position of molecule when the time is  $t$ , and  $r_i(0)$  is the initial position.

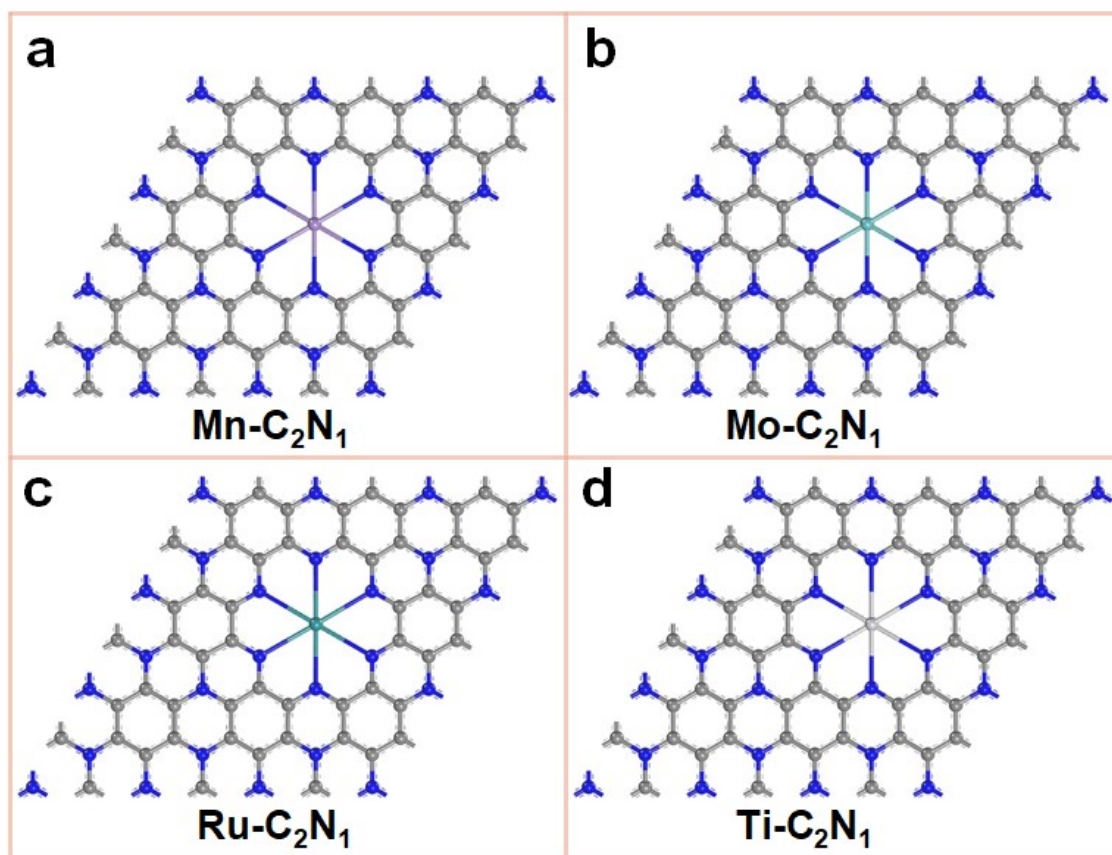

**Figure S1.** Optimized structure of 1TM-C<sub>2</sub>N<sub>1</sub>. (a) Mn-C<sub>2</sub>N<sub>1</sub>. (b) Mo-C<sub>2</sub>N<sub>1</sub>. (c) Ru-C<sub>2</sub>N<sub>1</sub>. (d) Ti-C<sub>2</sub>N<sub>1</sub>.



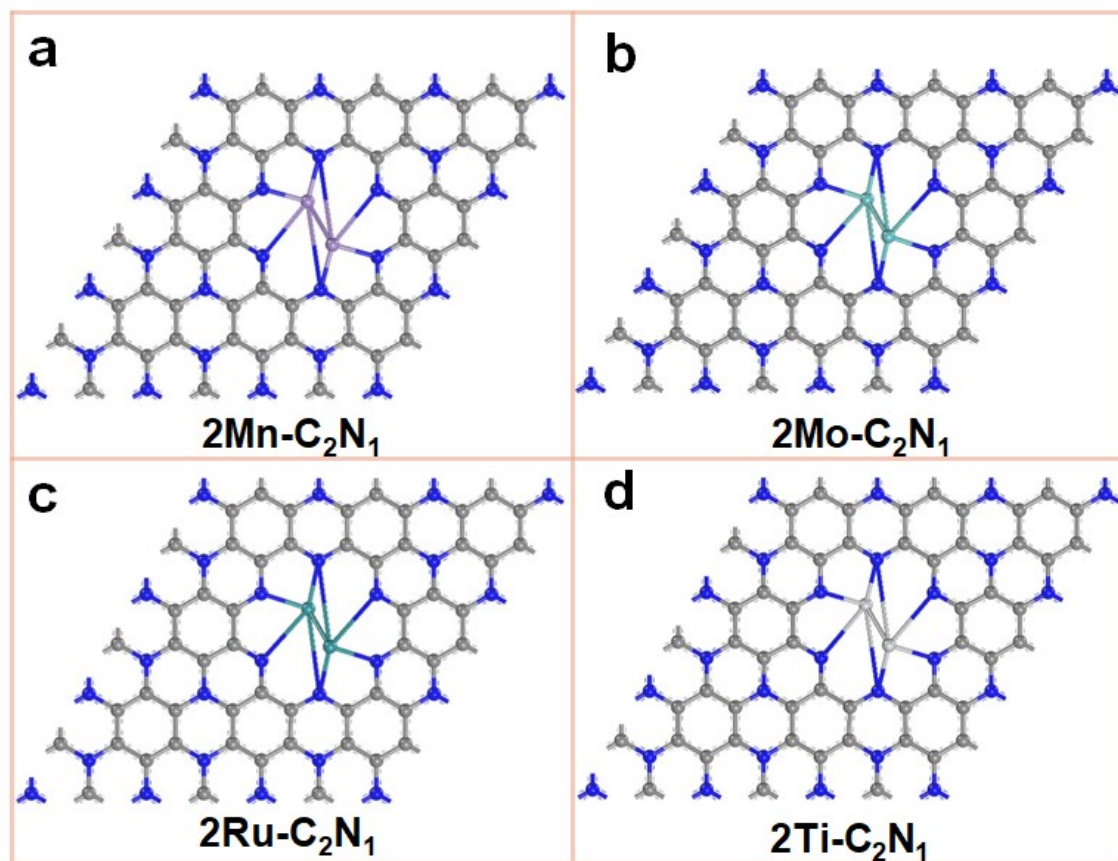

**Figure S2.** Optimized structure of  $2\text{TM-C}_2\text{N}_1$ . (a)  $2\text{Mn-C}_2\text{N}_1$ . (b)  $2\text{Mo-C}_2\text{N}_1$ . (c)  $2\text{Ru-C}_2\text{N}_1$ . (d)  $2\text{Ti-C}_2\text{N}_1$ .

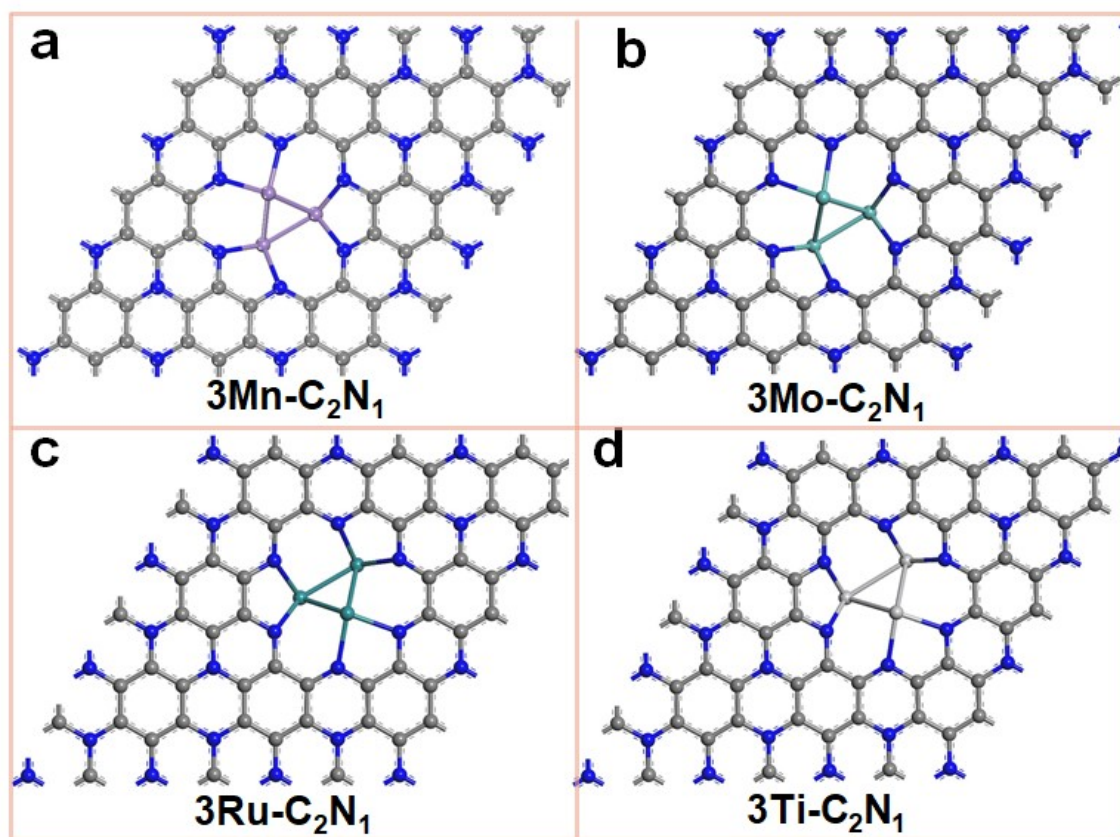

**Figure S3.** Optimized structure of 3TM-C<sub>2</sub>N<sub>1</sub>. (a) 3Mn-C<sub>2</sub>N<sub>1</sub>. (b) 3Mo-C<sub>2</sub>N<sub>1</sub>. (c) 3Ru-C<sub>2</sub>N<sub>1</sub>. (d) 3Ti-C<sub>2</sub>N<sub>1</sub>.

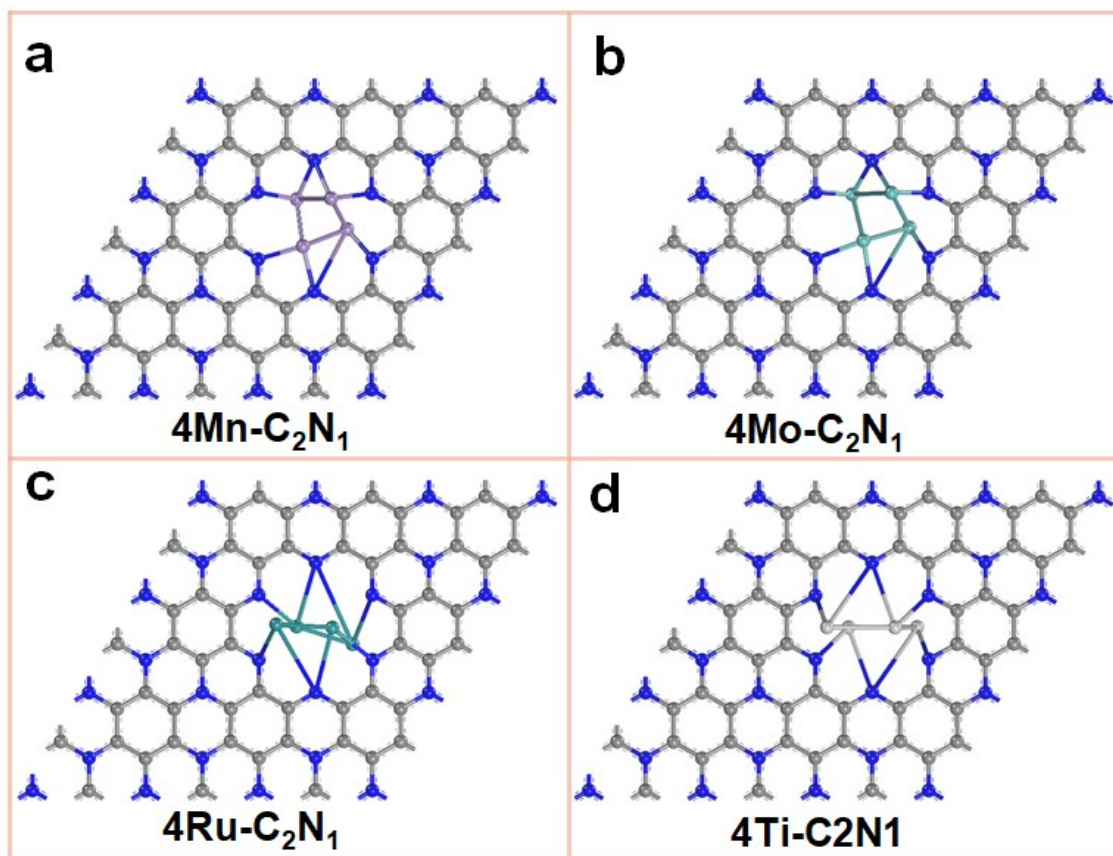

**Figure S4.** Optimized structure of 4TM-C<sub>2</sub>N<sub>1</sub>. (a) 4Mn-C<sub>2</sub>N<sub>1</sub>. (b) 4Mo-C<sub>2</sub>N<sub>1</sub>. (c) 4Ru-C<sub>2</sub>N<sub>1</sub>. (d) 4Ti-C<sub>2</sub>N<sub>1</sub>.

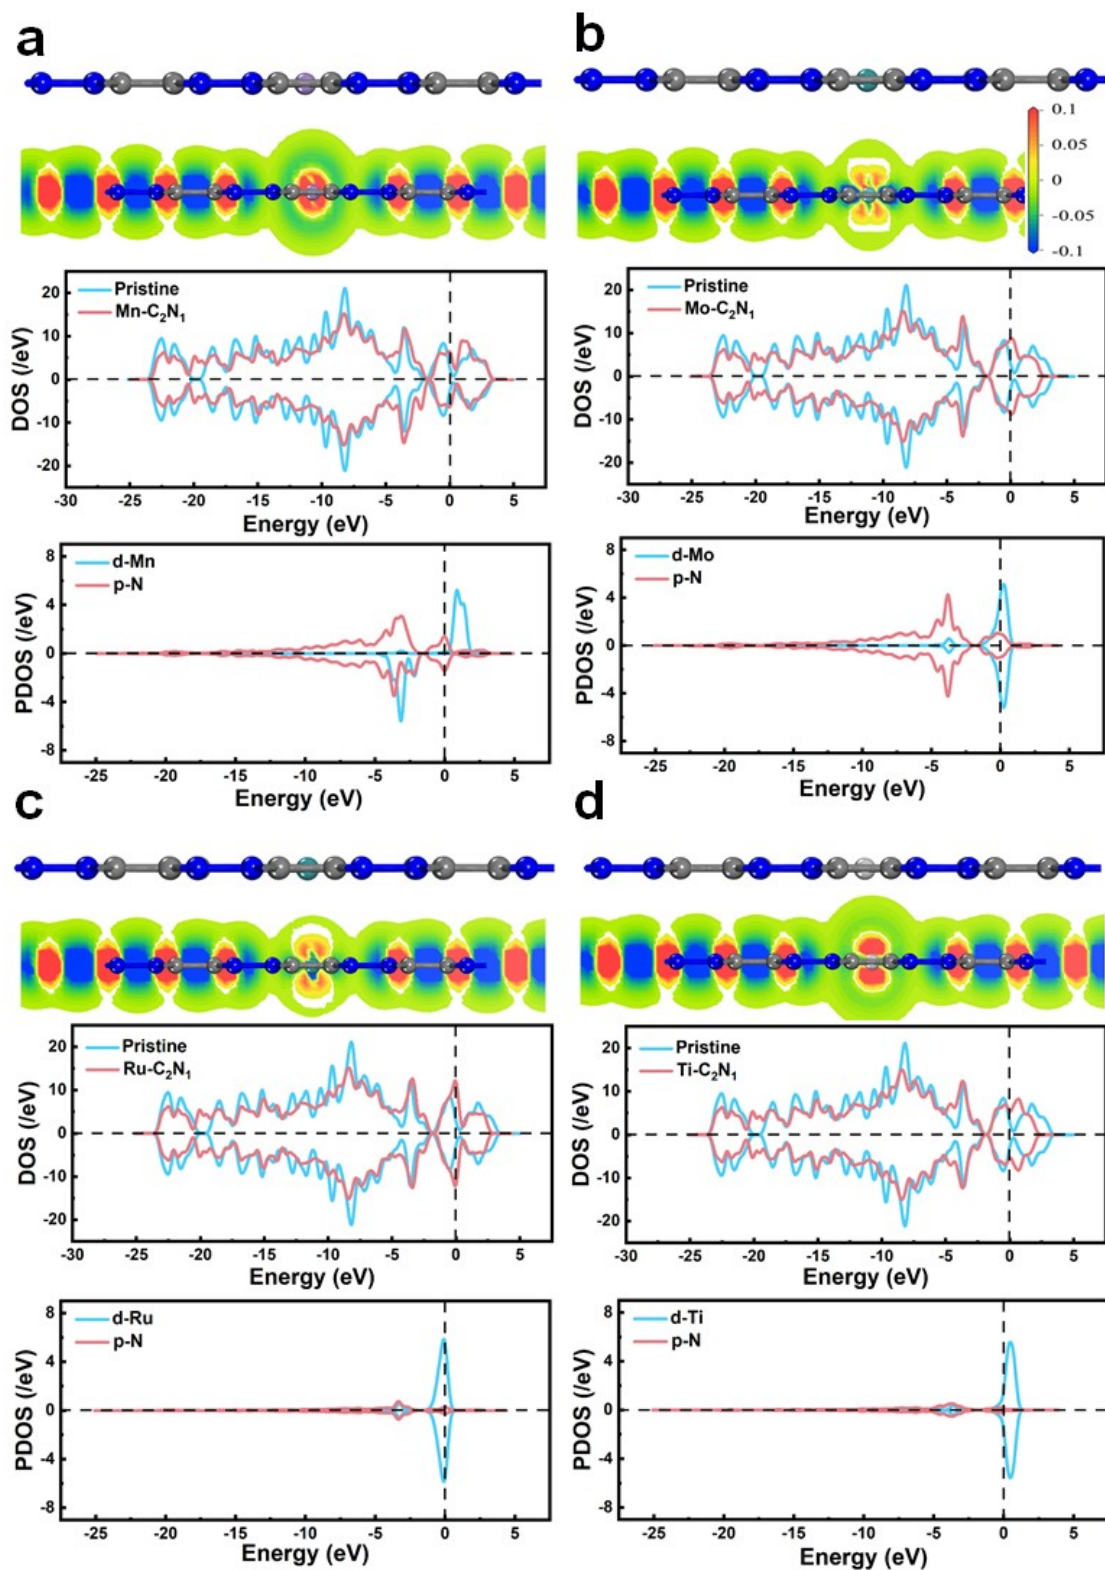

**Figure S5.** Density of states and charge density of 1TM-C<sub>2</sub>N<sub>1</sub> (a) Mn-C<sub>2</sub>N<sub>1</sub>, (b) Mo-C<sub>2</sub>N<sub>1</sub>, (c) Ru-C<sub>2</sub>N<sub>1</sub>, and (d) Ti-C<sub>2</sub>N<sub>1</sub>. Densities are displayed with an isosurface and the interval of isovalue is between  $-0.1$  and  $0.1$  e/Å<sup>3</sup>.



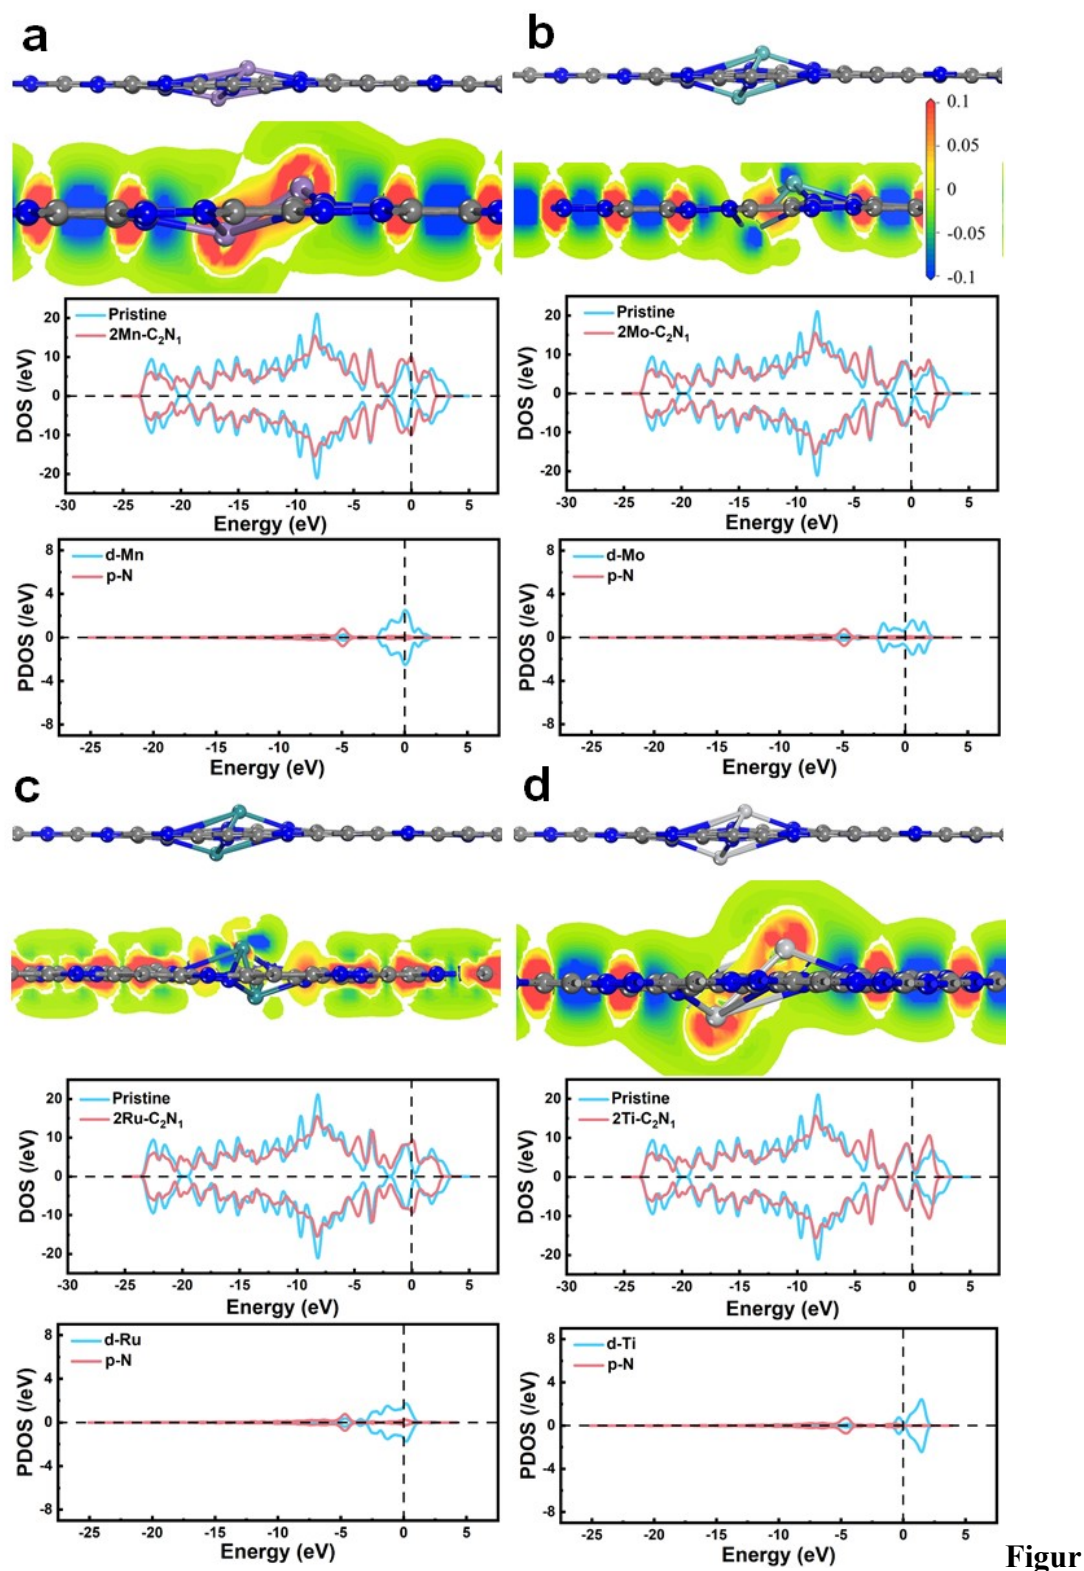

**e S6.** Density of states and charge density of 2TM-C<sub>2</sub>N<sub>1</sub> (a) 2Mn-C<sub>2</sub>N<sub>1</sub>, (b) 2Mo-C<sub>2</sub>N<sub>1</sub>.

(c) 2Ru-C<sub>2</sub>N<sub>1</sub>, and (d) 2Ti-C<sub>2</sub>N<sub>1</sub>. Densities are displayed with an isosurface and the

interval of isovalue is between  $-0.1$  and  $0.1$   $e/\text{\AA}^3$ .



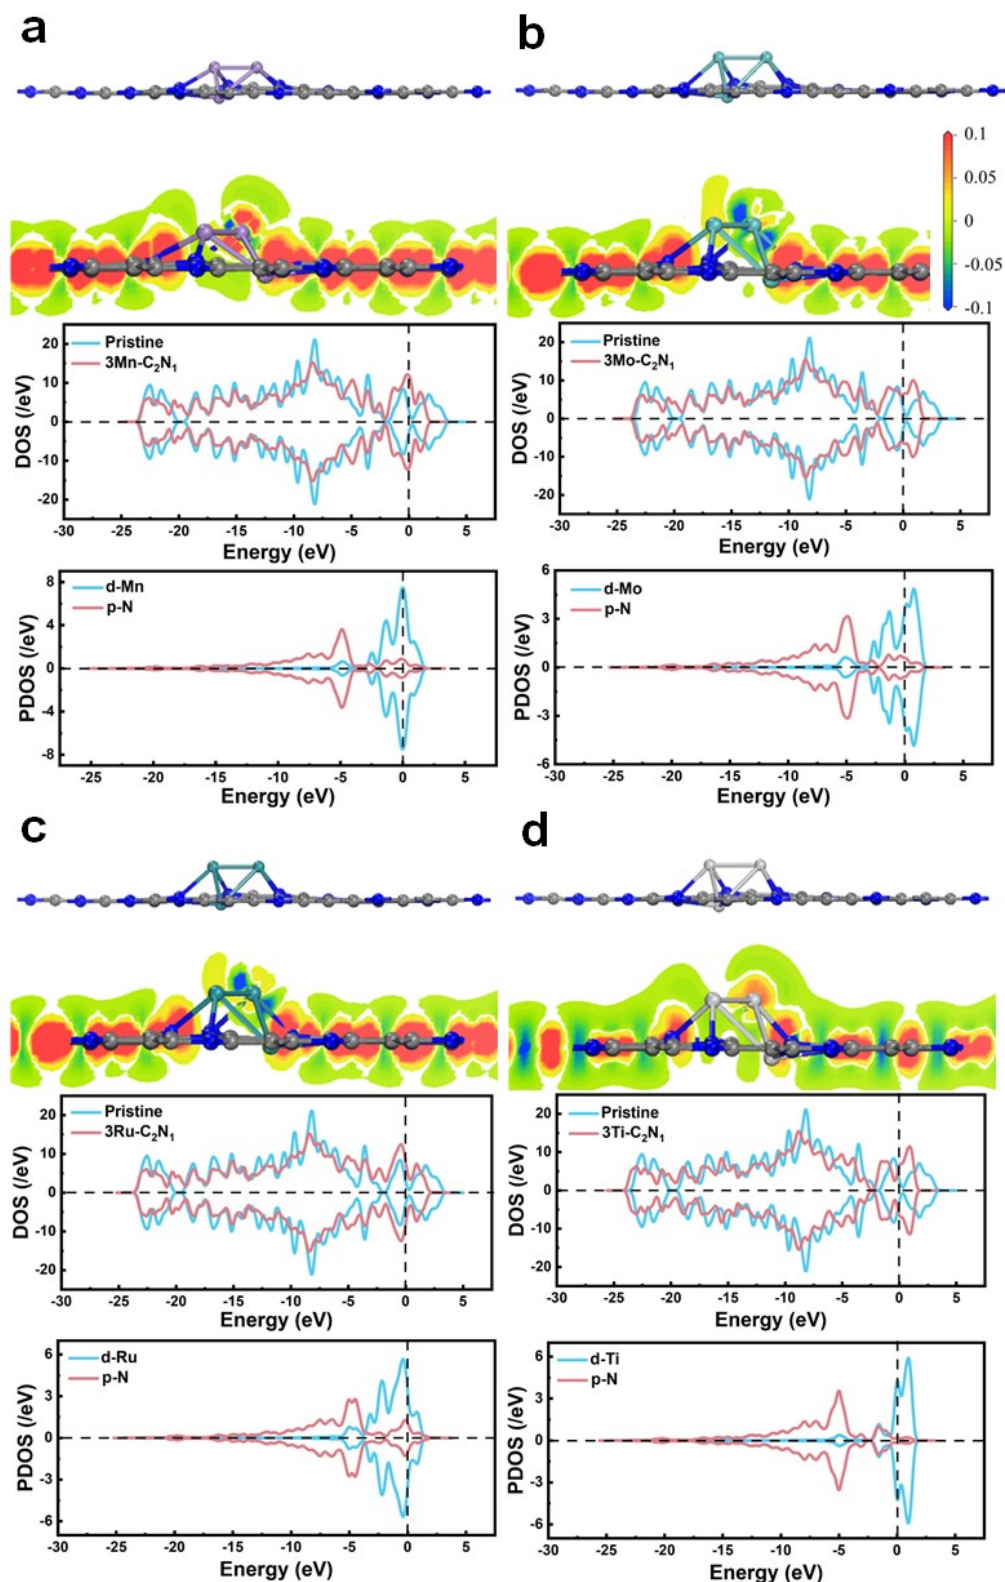

**Figure S7.** Density of states and charge density of  $3\text{TM-C}_2\text{N}_1$  (a)  $3\text{Mn-C}_2\text{N}_1$ , (b)  $3\text{Mo-C}_2\text{N}_1$ . (c)  $3\text{Ru-C}_2\text{N}_1$ , and (d)  $3\text{Ti-C}_2\text{N}_1$ . Densities are displayed with an isosurface and the interval of isovalue is between  $-0.1$  and  $0.1$   $\text{e}/\text{\AA}^3$ .

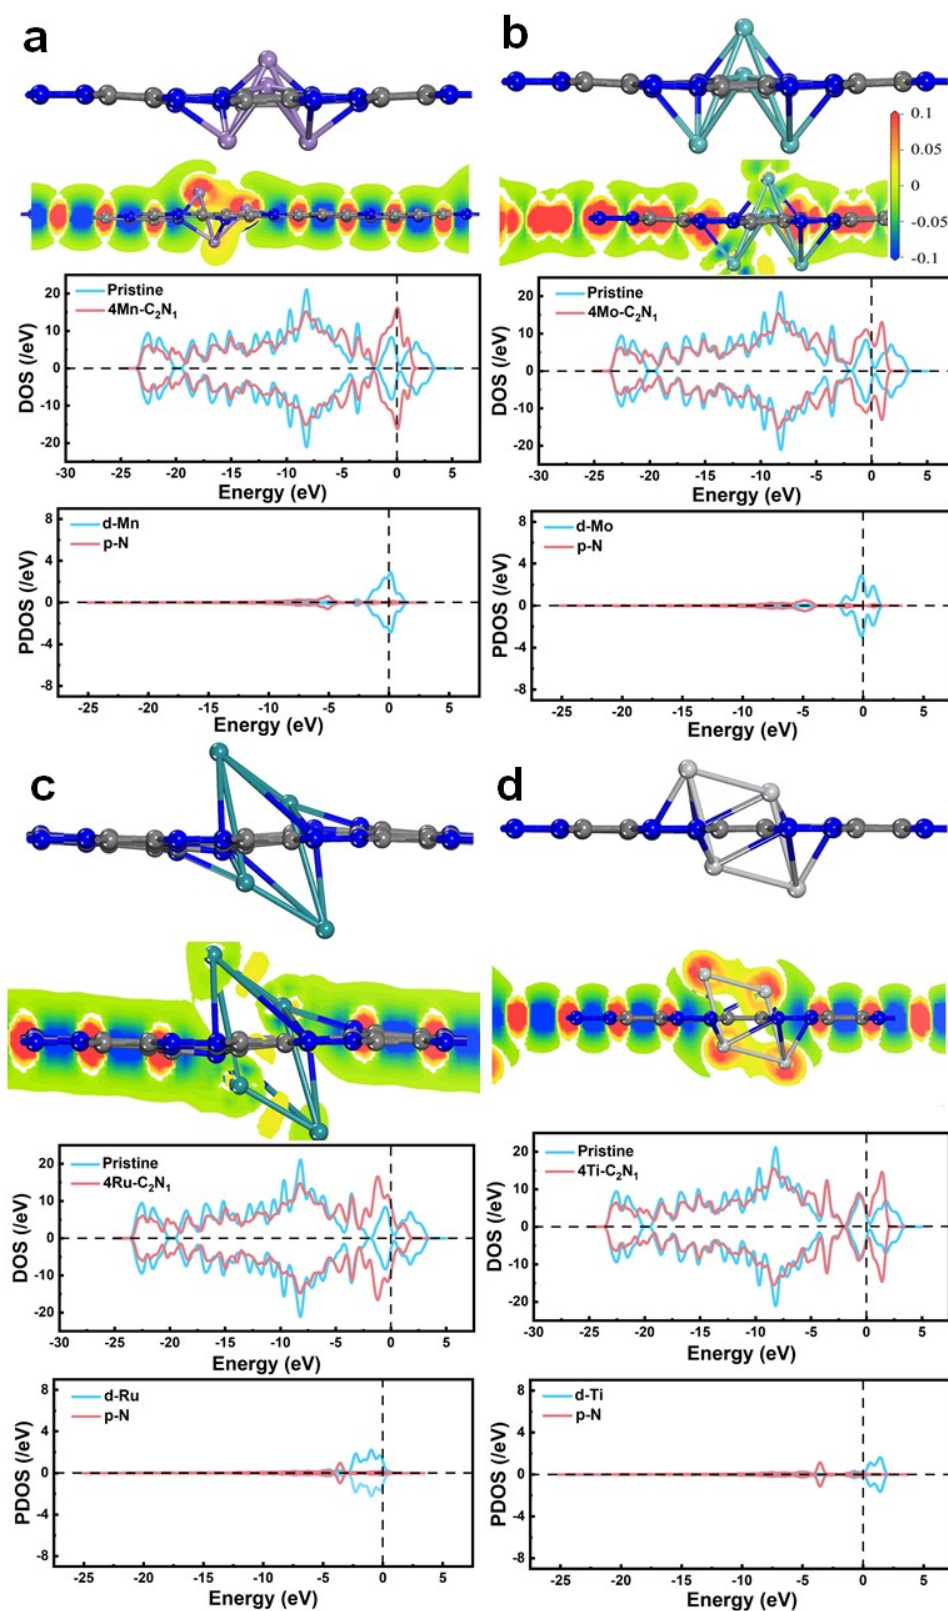

**Figure S8.** Density of states and charge density of 4TM-C<sub>2</sub>N<sub>1</sub> (a) 4Mn-C<sub>2</sub>N<sub>1</sub>, (b) 4Mo-C<sub>2</sub>N<sub>1</sub>, (c) 4Ru-C<sub>2</sub>N<sub>1</sub>, and (d) 4Ti-C<sub>2</sub>N<sub>1</sub>. Densities are displayed with an isosurface and the interval of isovalue is between  $-0.1$  and  $0.1$  e/Å<sup>3</sup>.



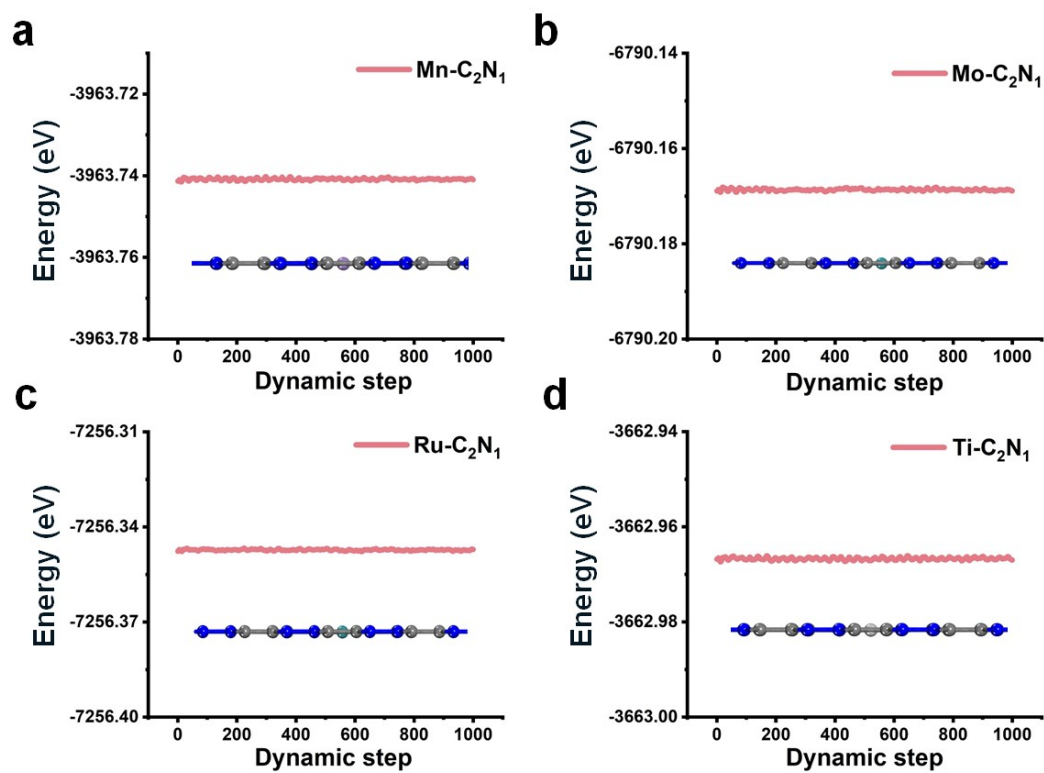

**Figure S9.** The *ab initio* molecular dynamics of CO<sub>2</sub> on (a) Mn-C<sub>2</sub>N<sub>1</sub>, (b) Mo-C<sub>2</sub>N<sub>1</sub>, (c) Ru-C<sub>2</sub>N<sub>1</sub> and (d) Ti-C<sub>2</sub>N<sub>1</sub> monolayer.

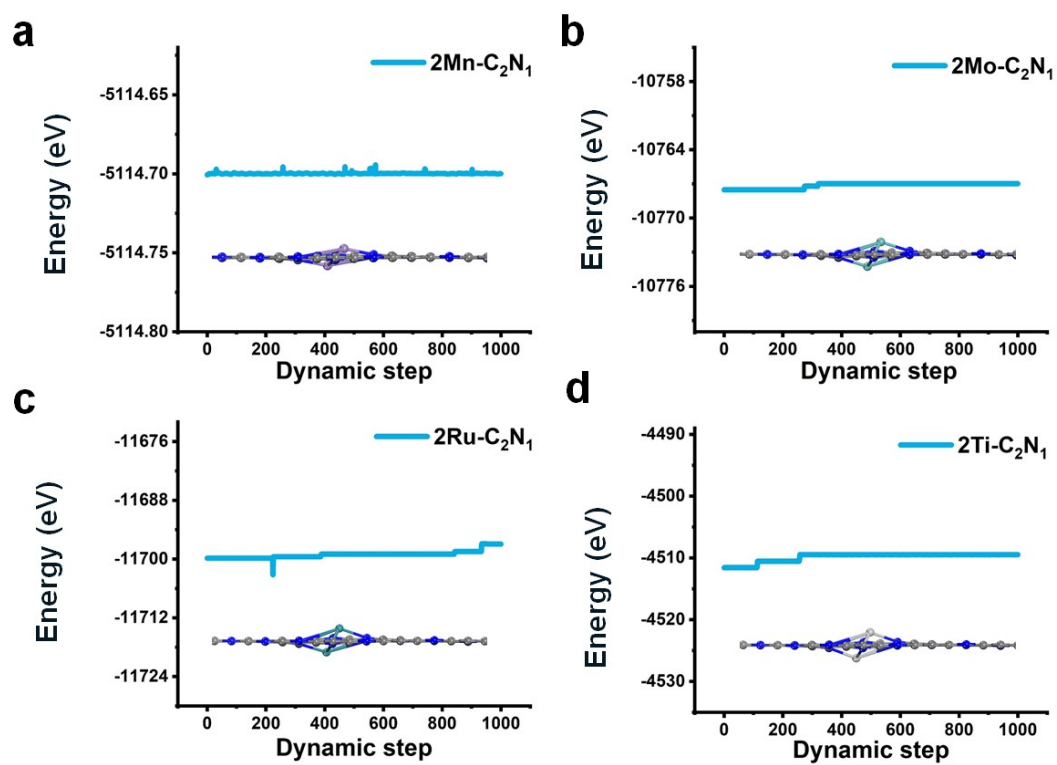

**Figure S10.** The *ab initio* molecular dynamics of CO<sub>2</sub> on (a) 2Mn-C<sub>2</sub>N<sub>1</sub>, (b) 2Mo-C<sub>2</sub>N<sub>1</sub>, (c) 2Ru-C<sub>2</sub>N<sub>1</sub> and (d) 2Ti-C<sub>2</sub>N<sub>1</sub> monolayer.

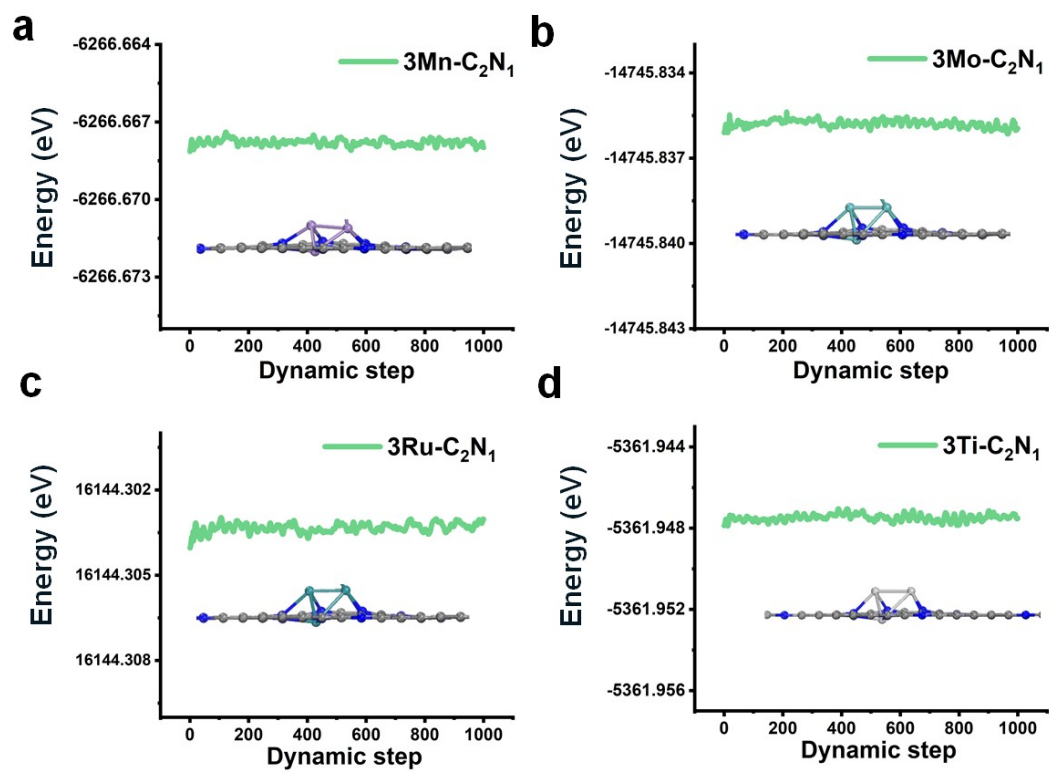

**Figure S11.** The *ab initio* molecular dynamics of CO<sub>2</sub> on (a) 3Mn-C<sub>2</sub>N<sub>1</sub>, (b) 3Mo-C<sub>2</sub>N<sub>1</sub>, (c) 3Ru-C<sub>2</sub>N<sub>1</sub> and (d) 3Ti-C<sub>2</sub>N<sub>1</sub> monolayer.

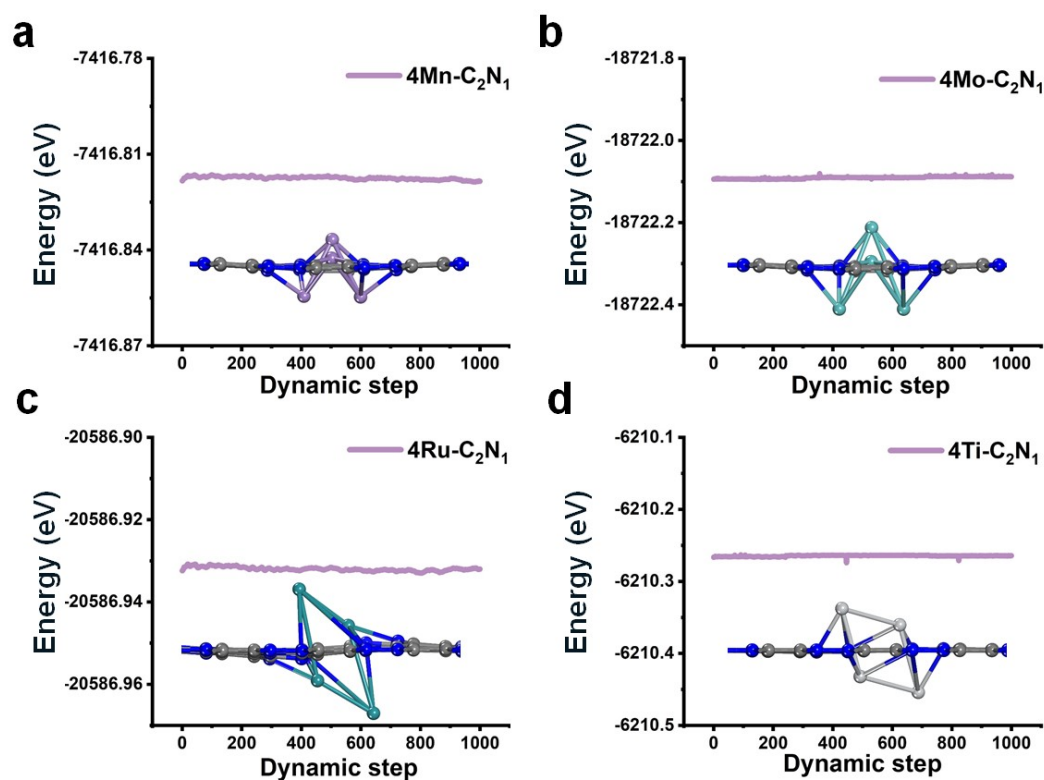

**Figure S12.** The *ab initio* molecular dynamics of CO<sub>2</sub> on (a) 4Mn-C<sub>2</sub>N<sub>1</sub>, (b) 4Mo-C<sub>2</sub>N<sub>1</sub>, (c) 4Ru-C<sub>2</sub>N<sub>1</sub> and (d) 4Ti-C<sub>2</sub>N<sub>1</sub> monolayer.

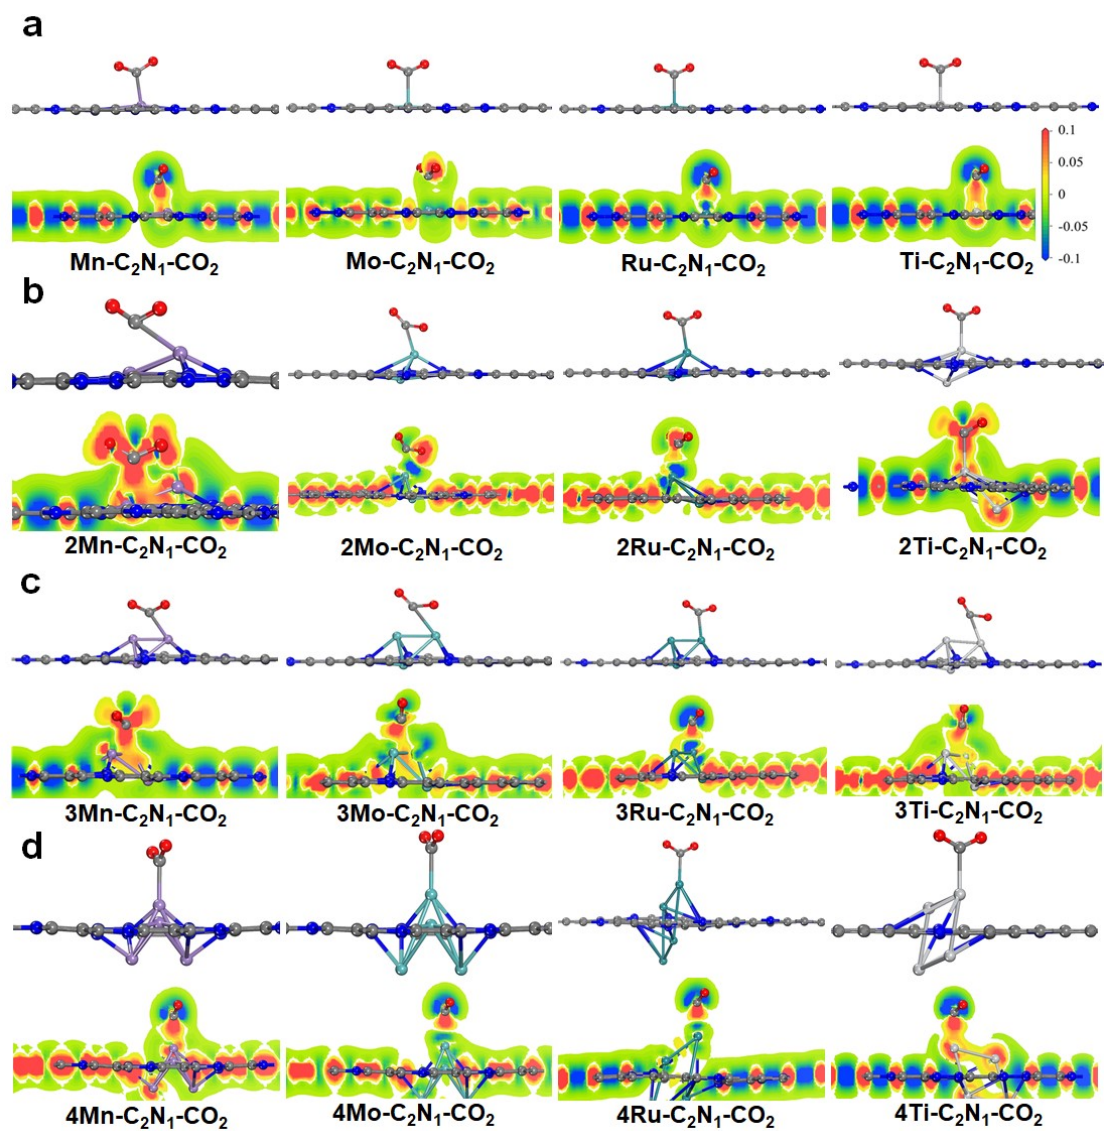

**Figure S13.** Charge density of CO<sub>2</sub> on TM-C<sub>2</sub>N<sub>1</sub>. (a) 1TM-C<sub>2</sub>N<sub>1</sub>-CO<sub>2</sub>, (b) 2TM-C<sub>2</sub>N<sub>1</sub>-CO<sub>2</sub>, (c) 3TM-C<sub>2</sub>N<sub>1</sub>-CO<sub>2</sub>, and (d) 4TM-C<sub>2</sub>N<sub>1</sub>-CO<sub>2</sub>. Densities are displayed with an isosurface and the interval of isovalue is between  $-0.1$  and  $0.1$  e/Å<sup>3</sup>.

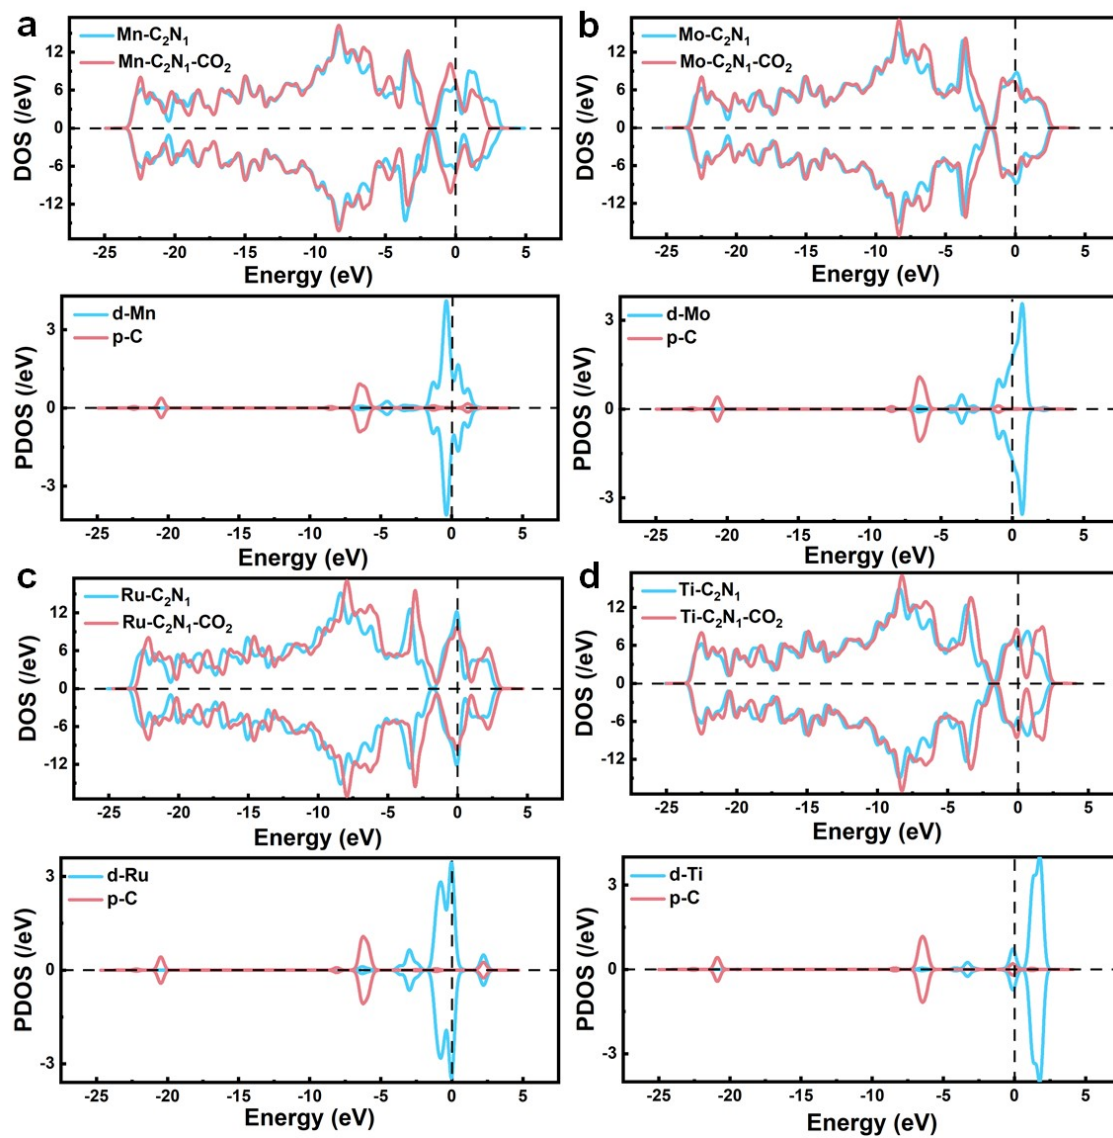

**Figure S14.** Density of states of (a) Mn-C<sub>2</sub>N<sub>1</sub>-CO<sub>2</sub>, (b) Mo-C<sub>2</sub>N<sub>1</sub>-CO<sub>2</sub>, (c) Ru-C<sub>2</sub>N<sub>1</sub>-CO<sub>2</sub>, and (d) Ti-C<sub>2</sub>N<sub>1</sub>-CO<sub>2</sub>.



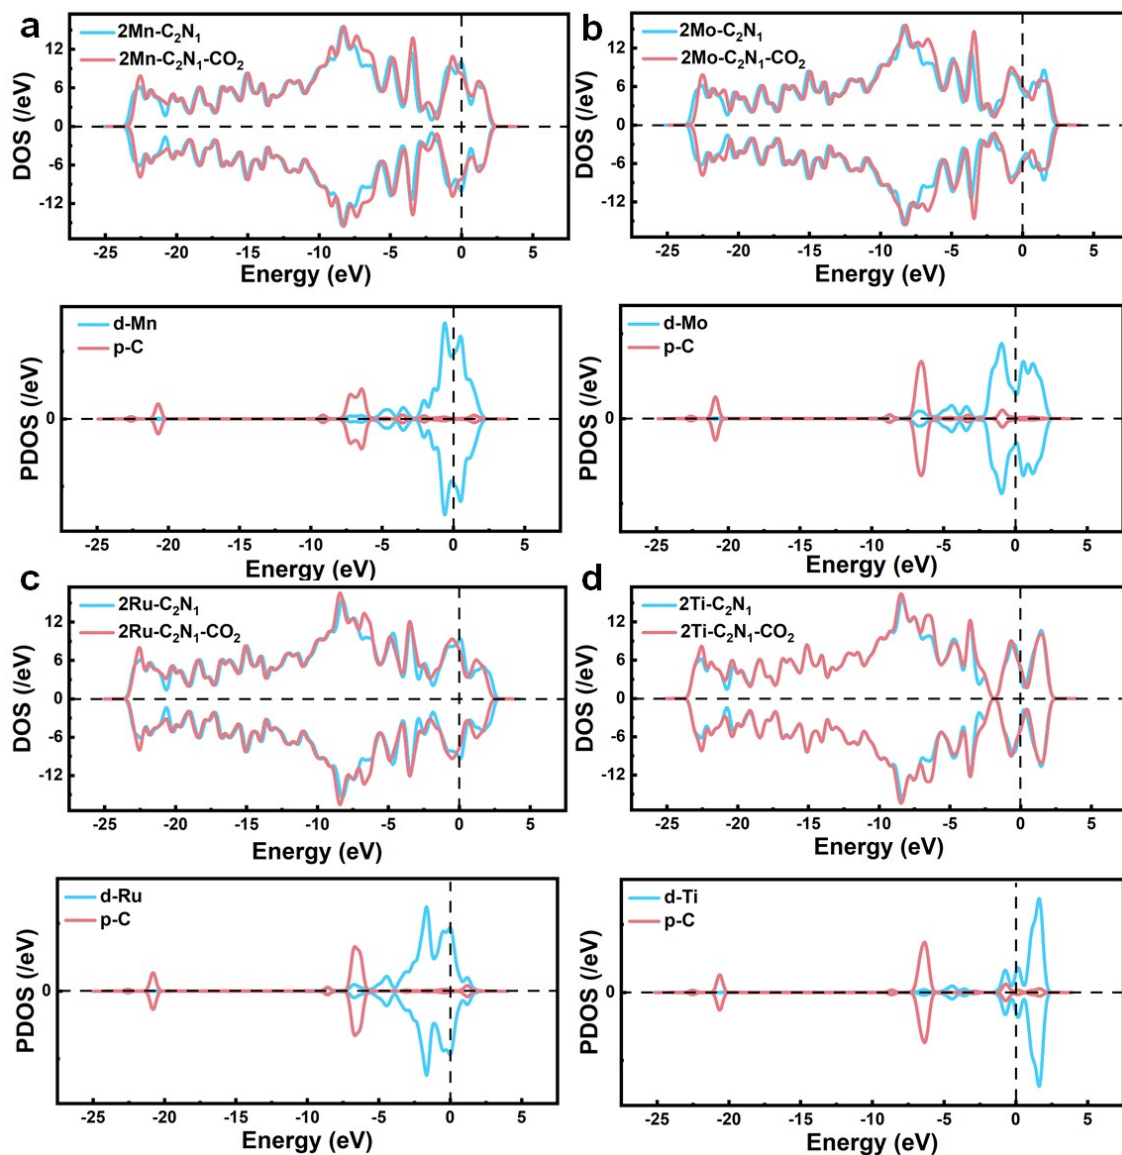

**Figure S15.** Density of states of (a) 2Mn-C<sub>2</sub>N<sub>1</sub>-CO<sub>2</sub>, (b) 2Mo-C<sub>2</sub>N<sub>1</sub>-CO<sub>2</sub>, (c) 2Ru-C<sub>2</sub>N<sub>1</sub>-CO<sub>2</sub>, and (d) 2Ti-C<sub>2</sub>N<sub>1</sub>-CO<sub>2</sub>.

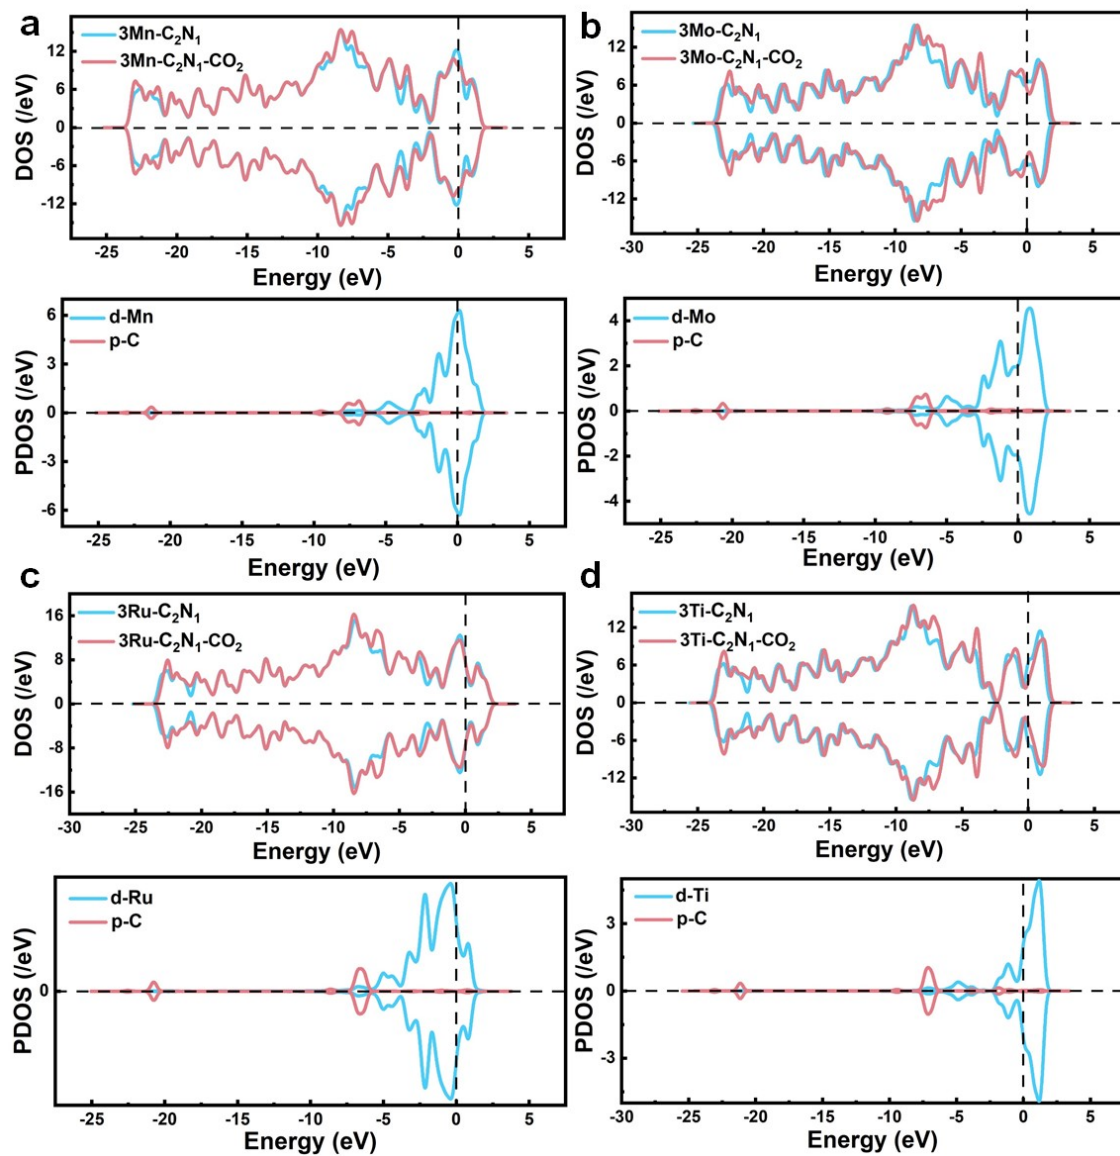

Figure S16. Density of states of (a) 3Mn-C<sub>2</sub>N<sub>1</sub>-CO<sub>2</sub>, (b) 3Mo-C<sub>2</sub>N<sub>1</sub>-CO<sub>2</sub>, (c) 3Ru-C<sub>2</sub>N<sub>1</sub>-CO<sub>2</sub>, and (d) 3Ti-C<sub>2</sub>N<sub>1</sub>-CO<sub>2</sub>.



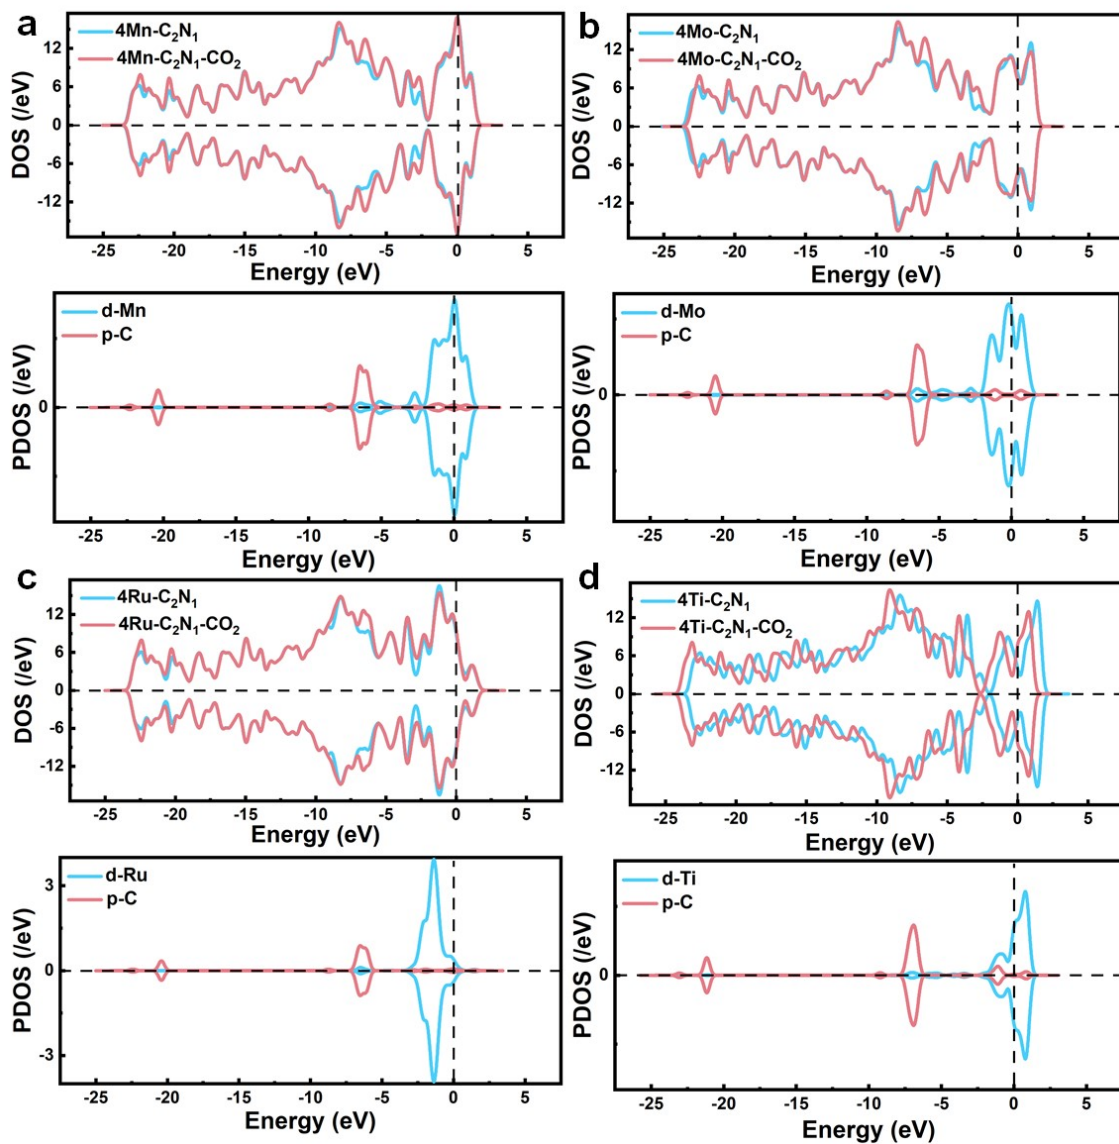

Figure S17. Density of states of (a)  $4\text{Mn-C}_2\text{N}_1\text{-CO}_2$ , (b)  $4\text{Mo-C}_2\text{N}_1\text{-CO}_2$ , (c)  $4\text{Ru-C}_2\text{N}_1\text{-CO}_2$ , and (d)  $4\text{Ti-C}_2\text{N}_1\text{-CO}_2$ .

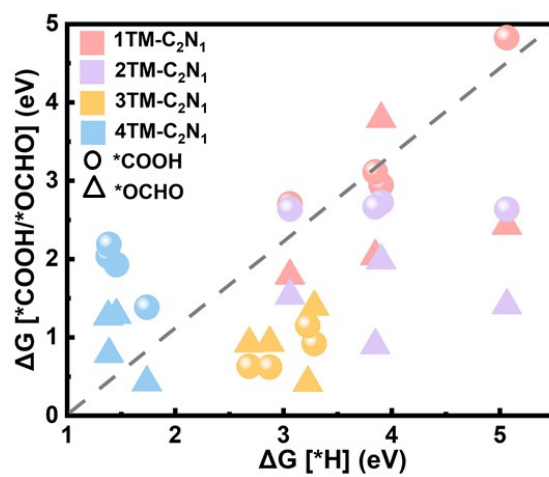

**Figure S18.** Free energy change of the first protonation step in the CO<sub>2</sub>RR and HER.

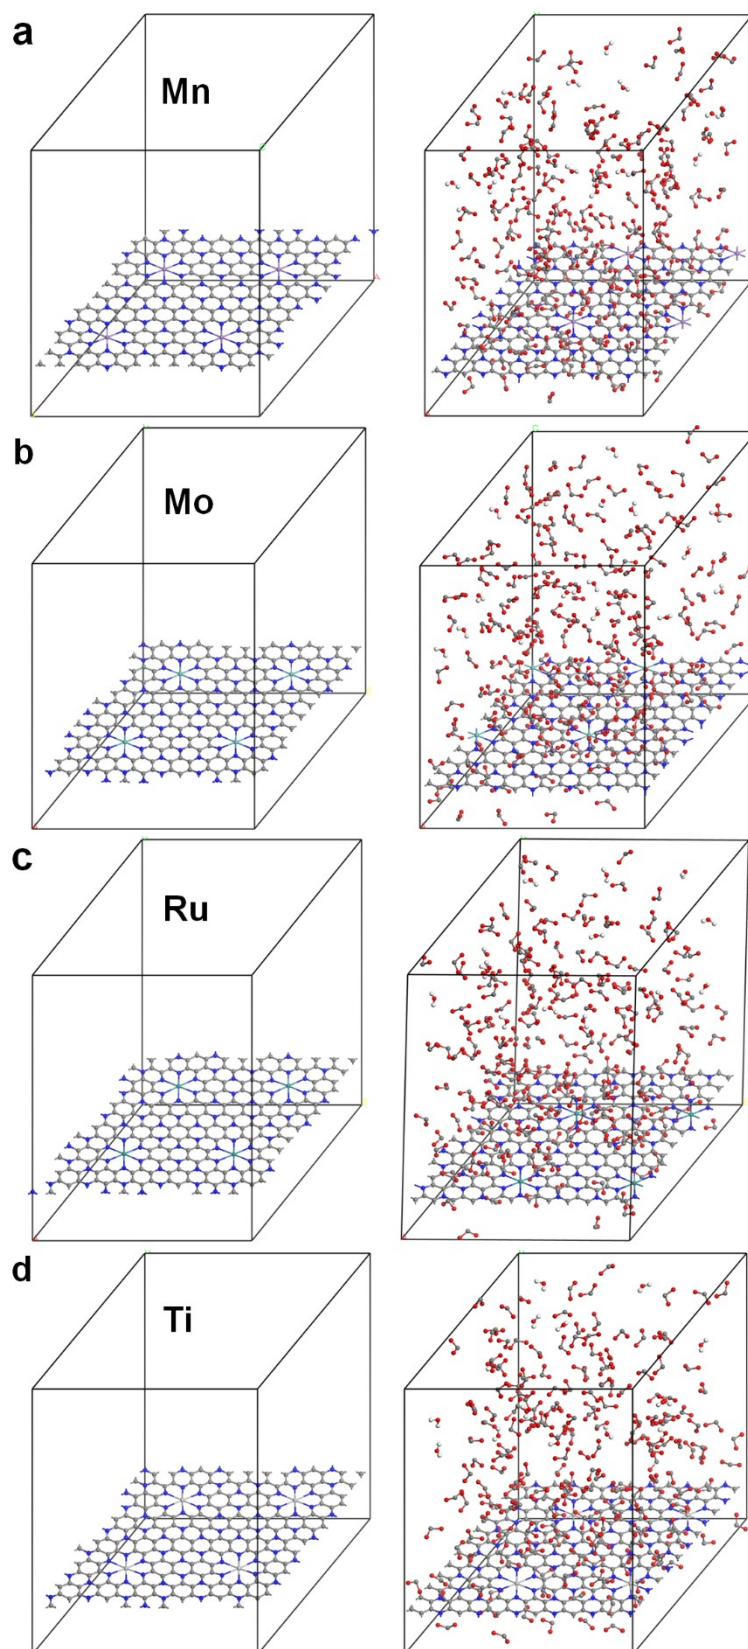

**Figure S19.** The initial and the final stable configurations of CO<sub>2</sub> on the 1TM-C<sub>2</sub>N<sub>1</sub>.

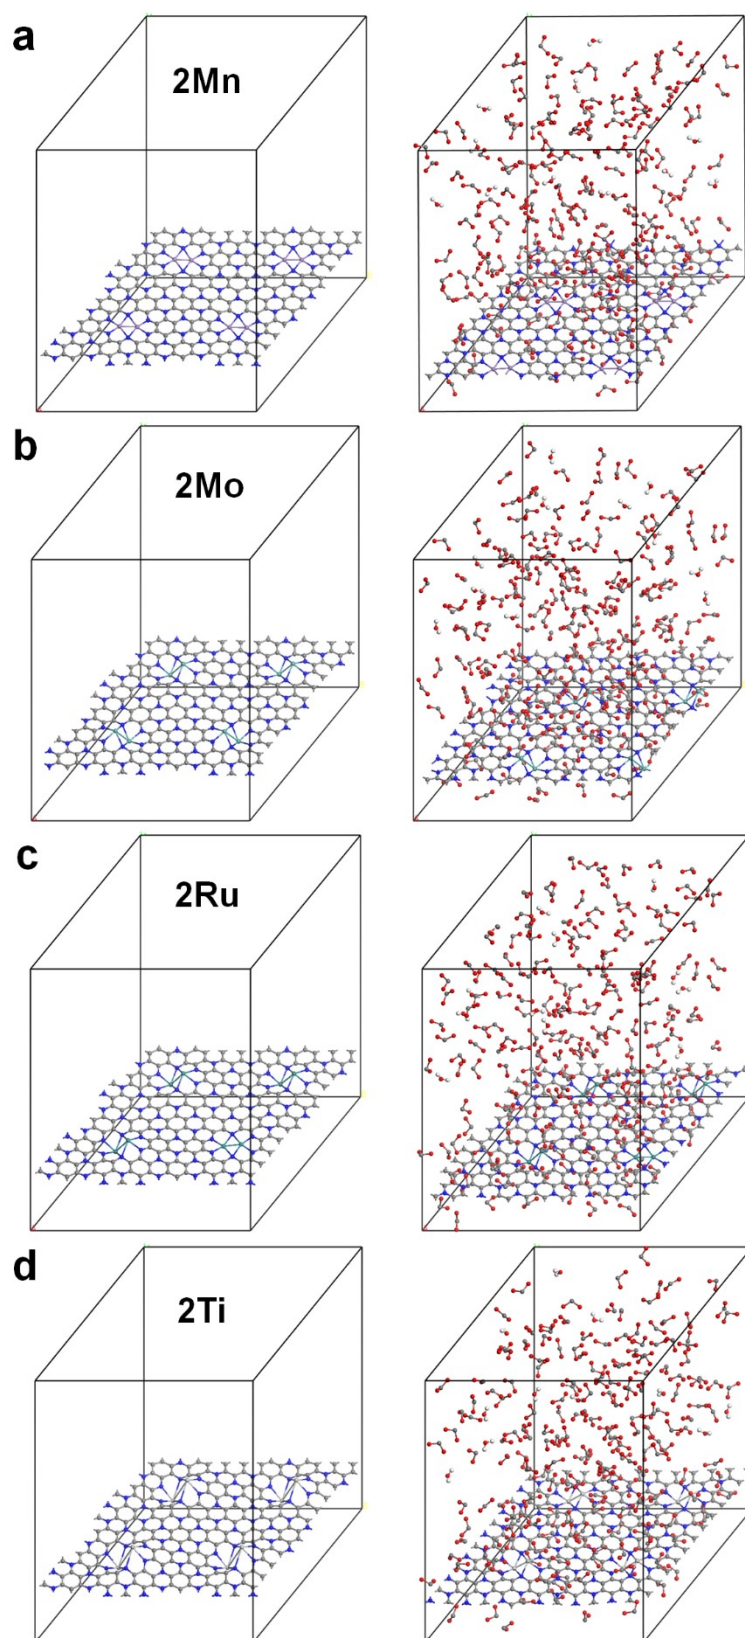

**Figure S20.** The initial and the final stable configurations of CO<sub>2</sub> on the 2TM-C<sub>2</sub>N<sub>1</sub>.



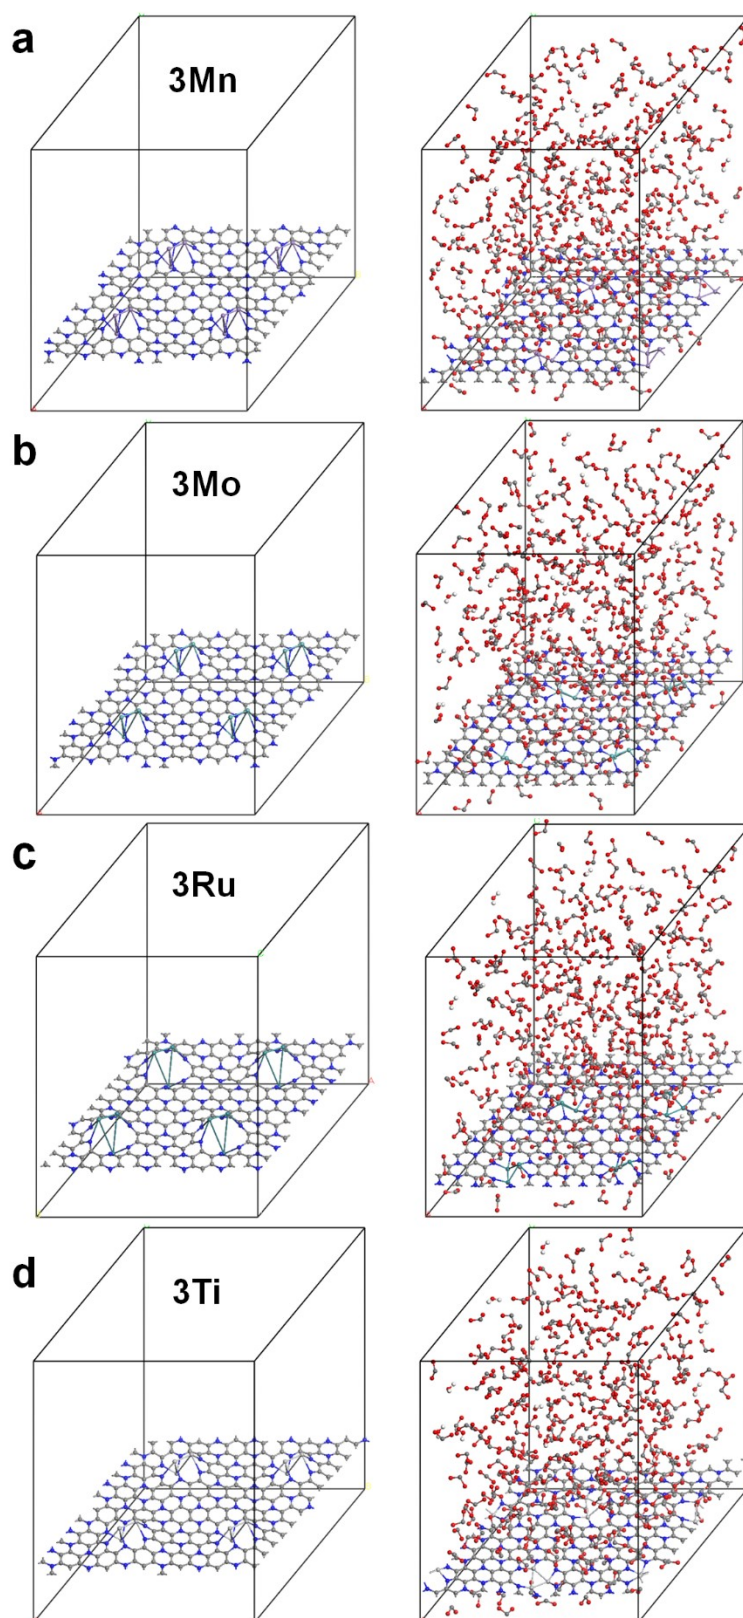

**Figure S21.** The initial and the final stable configurations of CO<sub>2</sub> on the 3TM-C<sub>2</sub>N<sub>1</sub>.

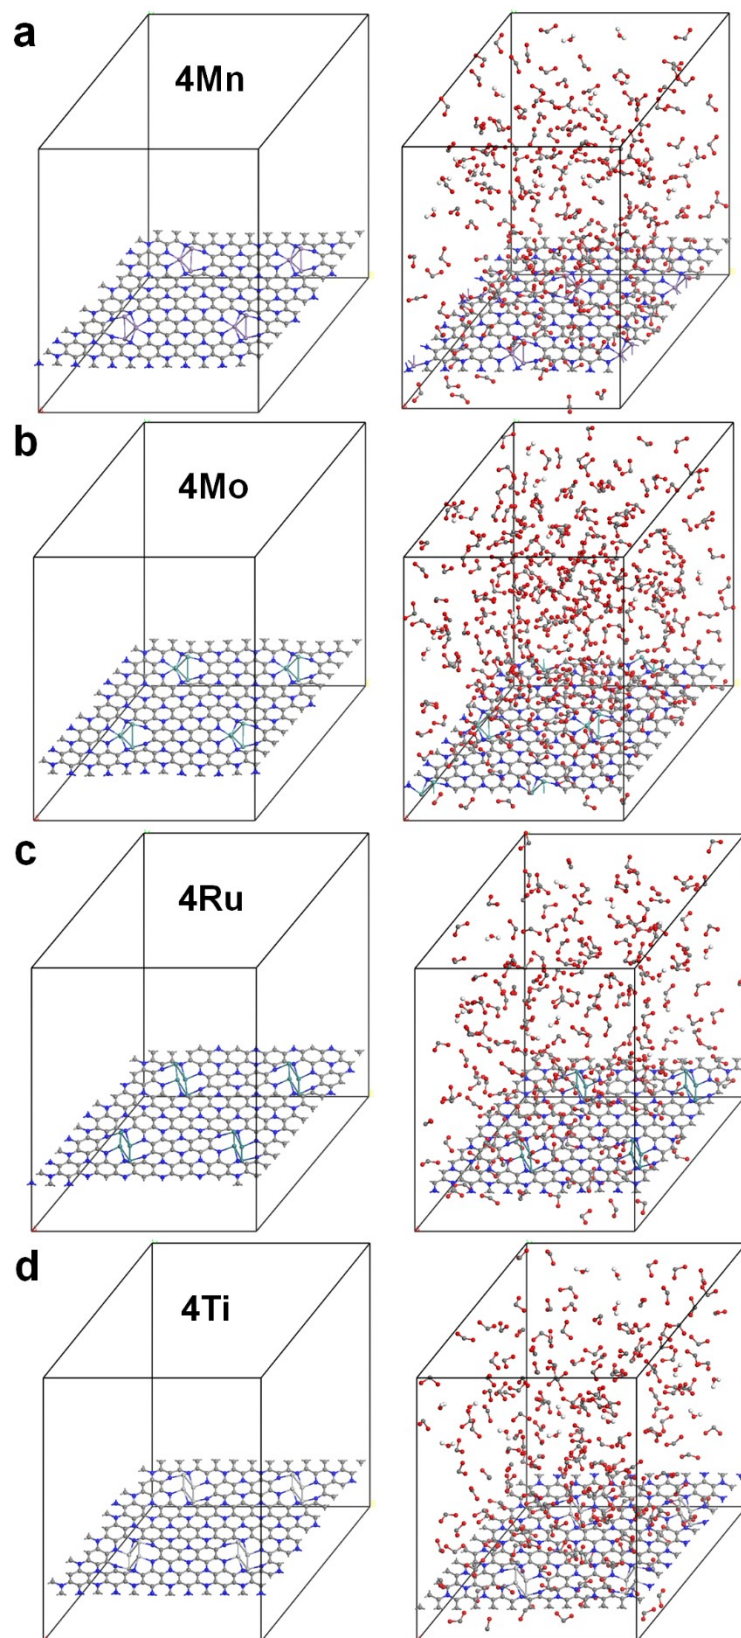

**Figure S22.** The initial and the final stable configurations of CO<sub>2</sub> on the 4TM-C<sub>2</sub>N<sub>1</sub>.

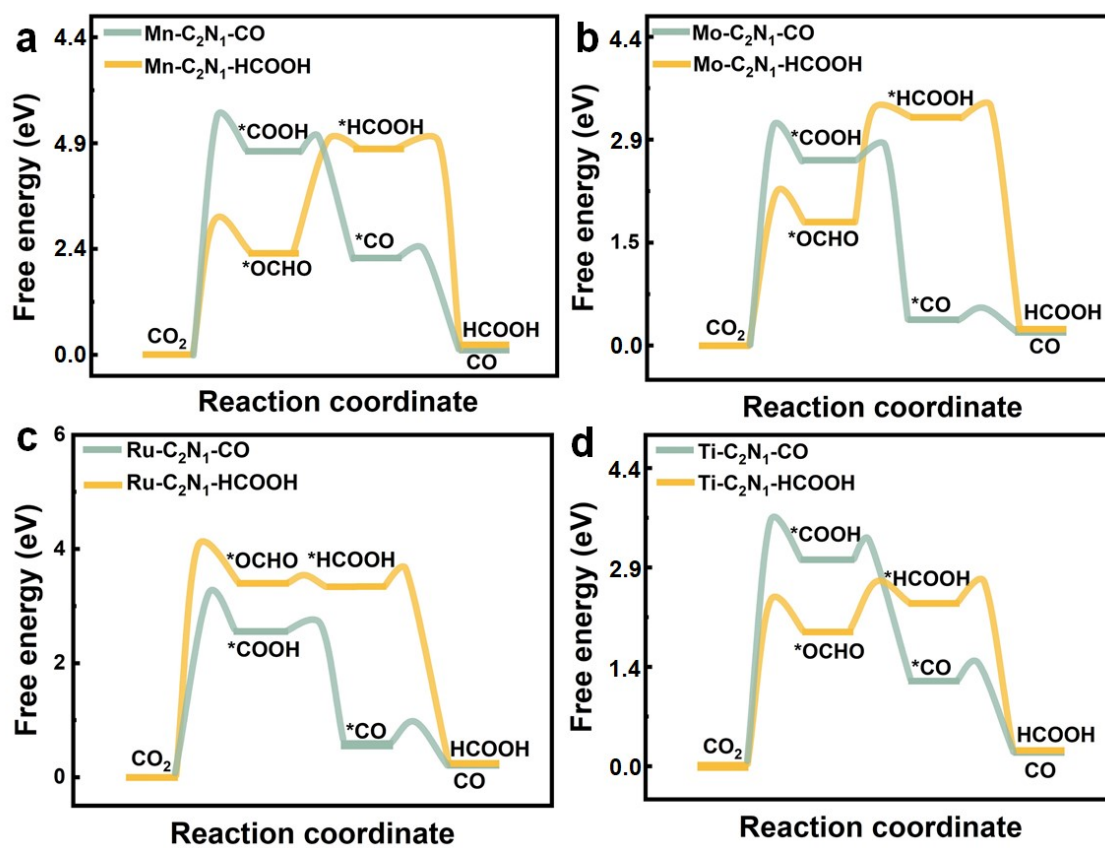

**Figure S23.** Gibbs free energy distribution diagram of CO<sub>2</sub> reduction pathway toward CO or HCOOH on (a) Mn-C<sub>2</sub>N<sub>1</sub>, (b) Mo-C<sub>2</sub>N<sub>1</sub>, (c) Ru-C<sub>2</sub>N<sub>1</sub>, and (d) Ti-C<sub>2</sub>N<sub>1</sub>.

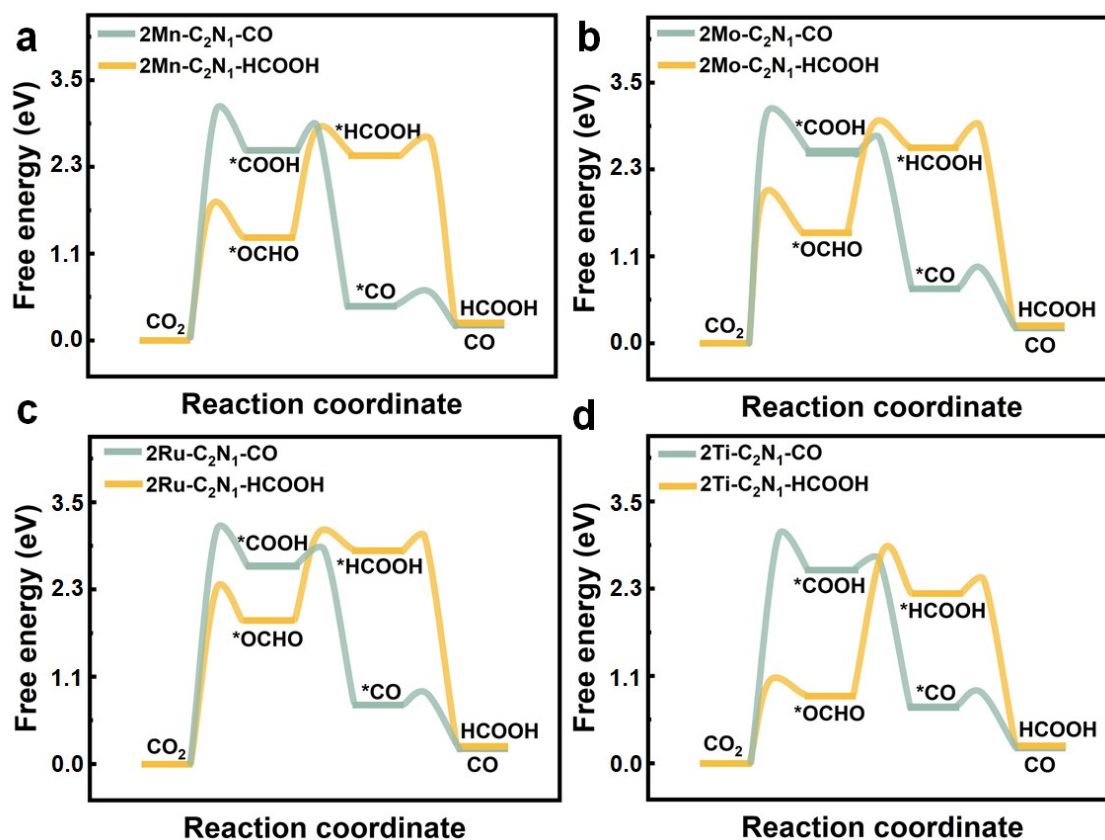

**Figure S24.** Gibbs free energy distribution diagram of CO<sub>2</sub> reduction pathway toward CO or HCOOH on (a) 2Mn-C<sub>2</sub>N<sub>1</sub>, (b) 2Mo-C<sub>2</sub>N<sub>1</sub>, (c) 2Ru-C<sub>2</sub>N<sub>1</sub>, and (d) 2Ti-C<sub>2</sub>N<sub>1</sub>.



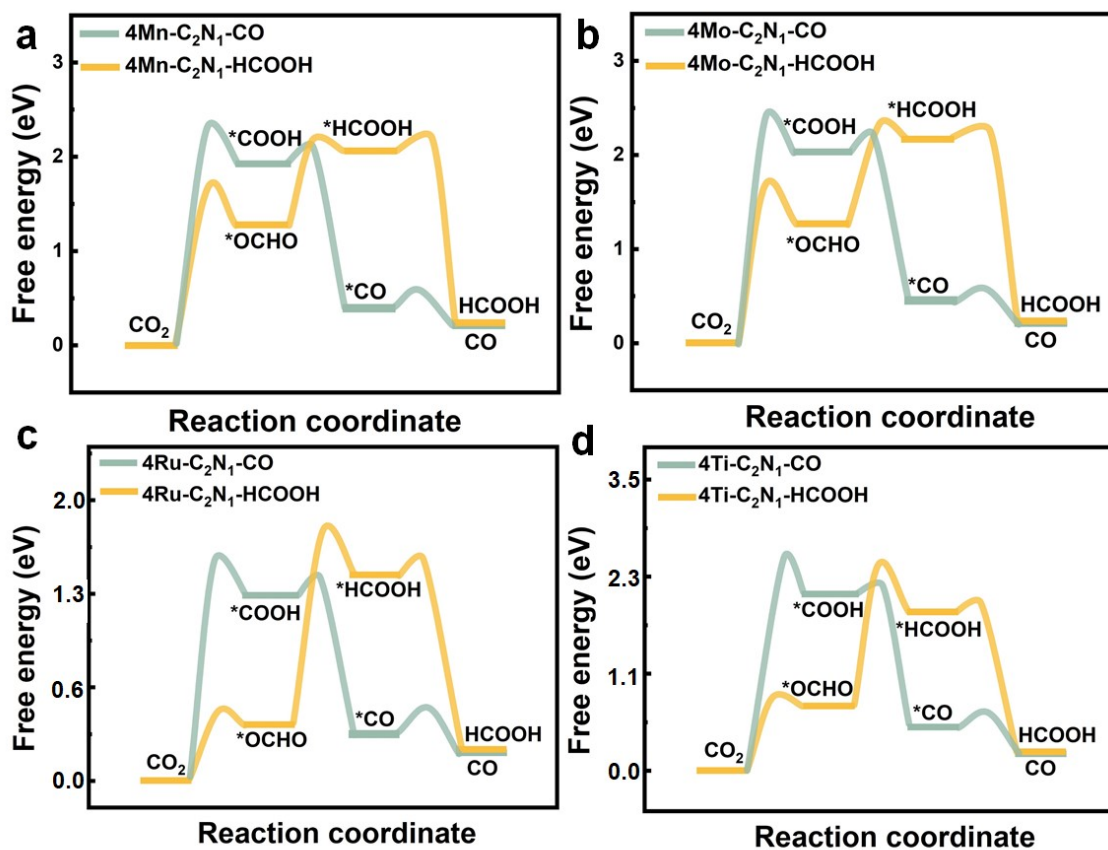

**Figure S25.** Gibbs free energy distribution diagram of CO<sub>2</sub> reduction pathway toward CO or HCOOH on (a) 4Mn-C<sub>2</sub>N<sub>1</sub>, (b) 4Mo-C<sub>2</sub>N<sub>1</sub>, (c) 4Ru-C<sub>2</sub>N<sub>1</sub>, and (d) 4Ti-C<sub>2</sub>N<sub>1</sub>.

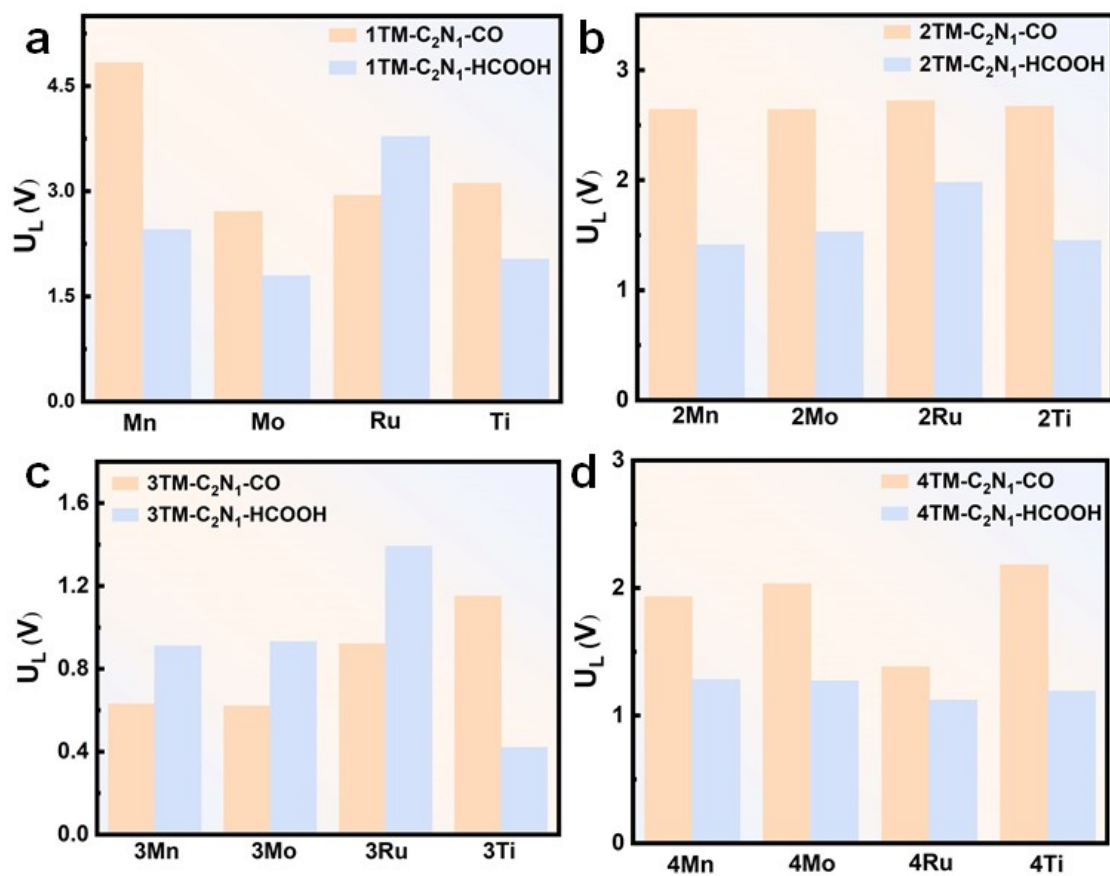

**Figure S26.** The limiting potential of CO or HCOOH on TM-C<sub>2</sub>N<sub>1</sub>. (a) 1TM-C<sub>2</sub>N<sub>1</sub>, (b) 2TM-C<sub>2</sub>N<sub>1</sub>. (c) 3TM-C<sub>2</sub>N<sub>1</sub>, and (d) 4TM-C<sub>2</sub>N<sub>1</sub>.

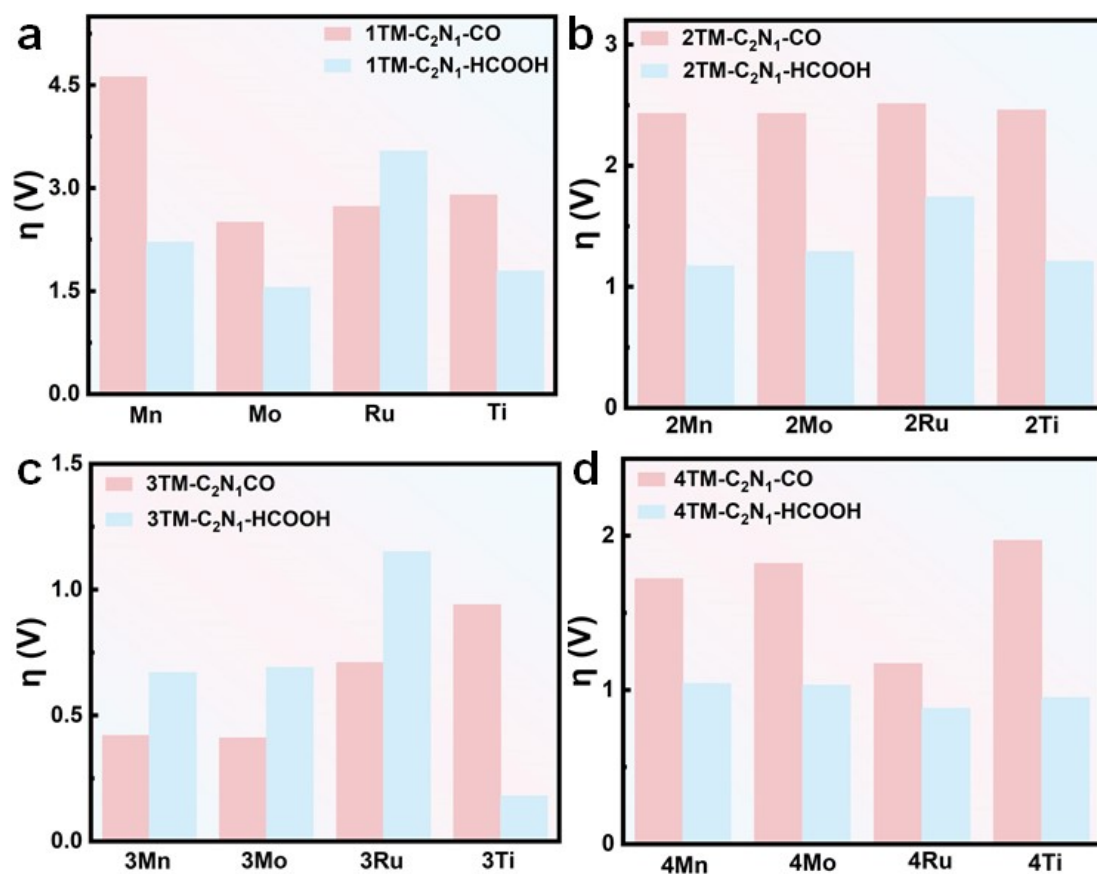

**Figure S27.** Overpotential of CO or HCOOH on TM-C<sub>2</sub>N<sub>1</sub>. (a) 1TM-C<sub>2</sub>N<sub>1</sub>, (b) 2TM-C<sub>2</sub>N<sub>1</sub>, (c) 3TM-C<sub>2</sub>N<sub>1</sub>, and (d) 4TM-C<sub>2</sub>N<sub>1</sub>.

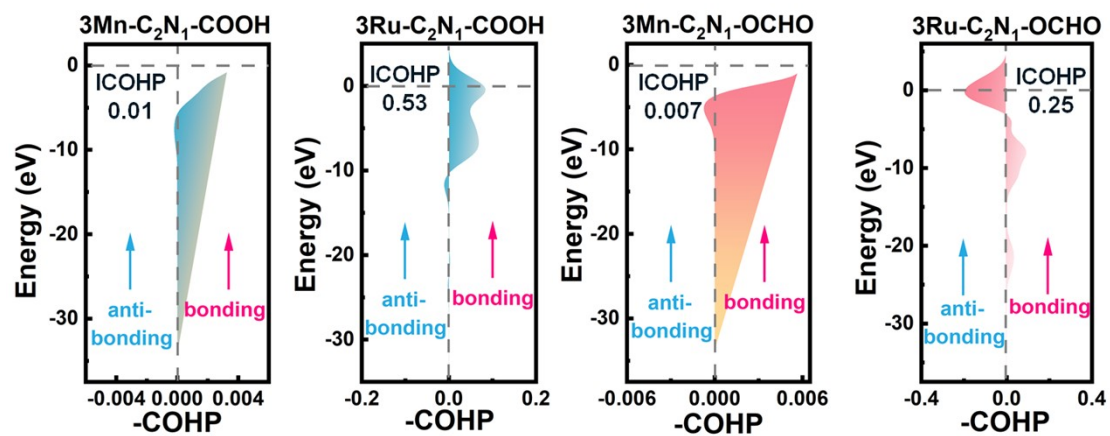

Figure S28. ICOHP value of \*COOH and \*OCHO on the 3TM-C<sub>2</sub>N<sub>1</sub>.

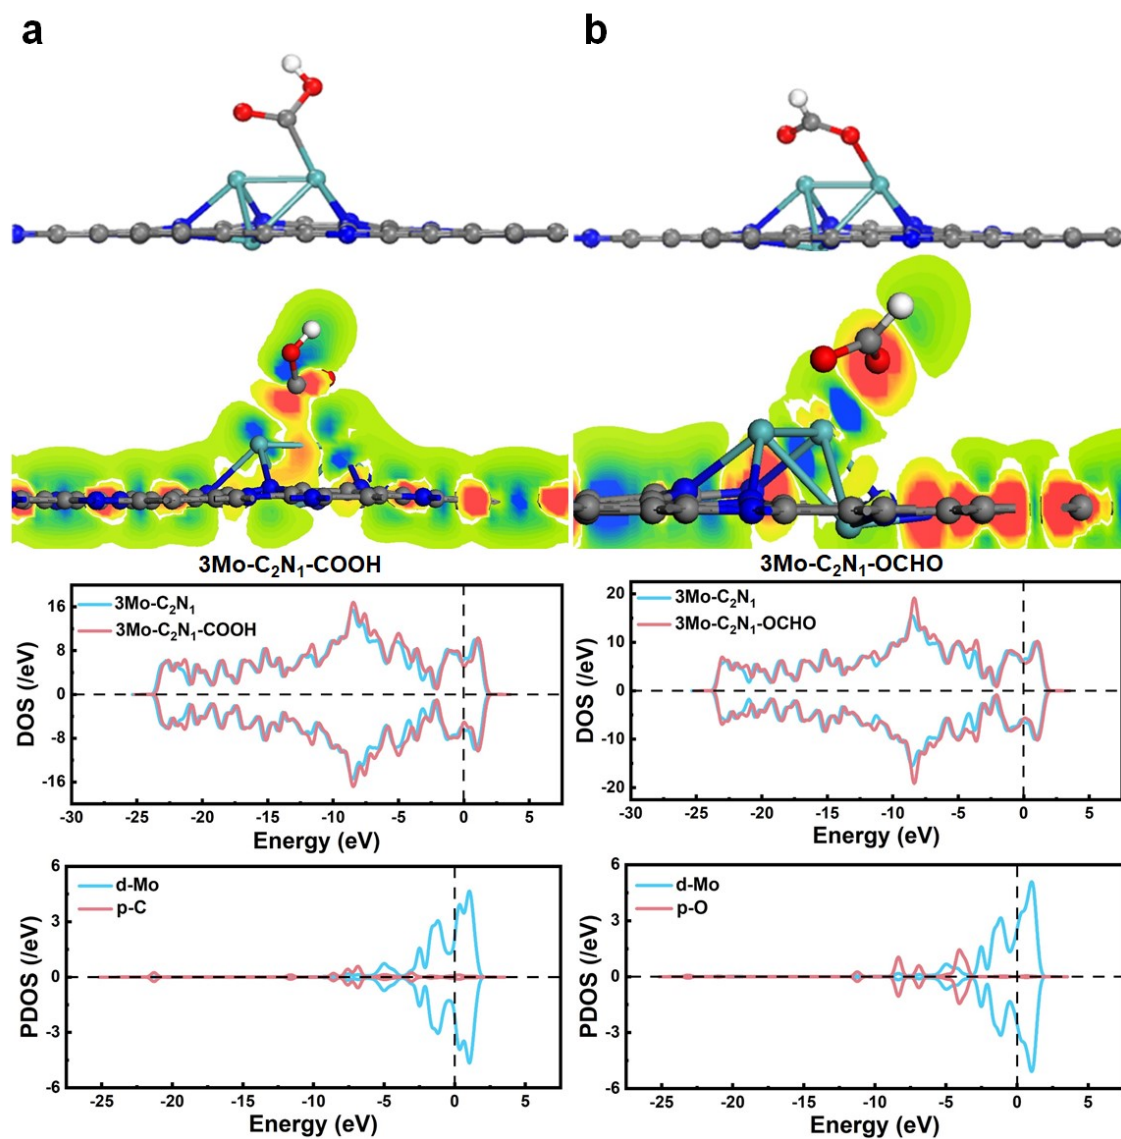

**Figure S29.** The stable structure, charge density, and DOS of (a)  $\text{*COOH}$  and (b)  $\text{*OCHO}$  on  $3\text{Mo-C}_2\text{N}_1$ . Densities are displayed with an isosurface and the interval of isovalue is between  $-0.1$  and  $0.1 \text{ e}/\text{\AA}^3$ .

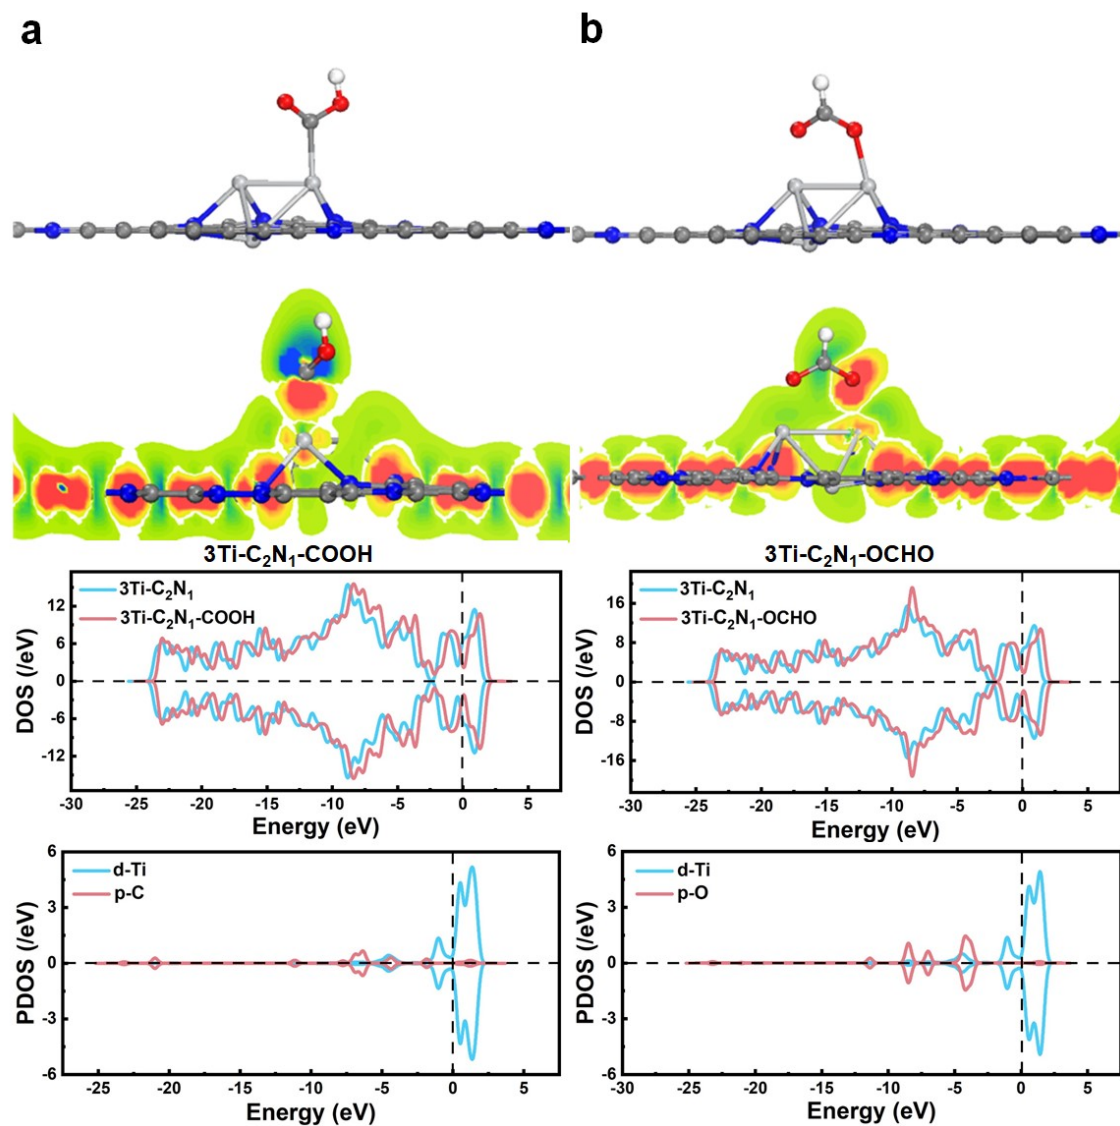

**Figure S30.** The stable structure, charge density, and DOS of (a) \*OCHO and (b) \*COOH on 3Ti-C<sub>2</sub>N<sub>1</sub>. Densities are displayed with an isosurface and the interval of isovalue is between  $-0.1$  and  $0.1 \text{ e}/\text{\AA}^3$ .

**Table S1.** The adsorption energies ( $E_{\text{ads}}$ ), bond lengths of C and O atoms in  $\text{CO}_2$  ( $d_{\text{c-o}}$ ), O-C-O angles of the most stable  $\text{CO}_2$  adsorption configurations on the TM- $\text{C}_2\text{N}_1$ .

| Models                      | $E_{\text{ads}}$ (eV) | $d_{\text{c-o}}$ (Å) | O-C-O angles |
|-----------------------------|-----------------------|----------------------|--------------|
| Mn- $\text{C}_2\text{N}_1$  | -2.60                 | 1.20/1.18            | 163.22       |
| Mo- $\text{C}_2\text{N}_1$  | -0.29                 | 1.21/1.21            | 152.58       |
| Ru- $\text{C}_2\text{N}_1$  | -0.29                 | 1.20/1.20            | 157.20       |
| Ti- $\text{C}_2\text{N}_1$  | -0.53                 | 1.19/1.23            | 152.90       |
| 2Mn- $\text{C}_2\text{N}_1$ | -1.50                 | 1.24/1.32            | 137.32       |
| 2Mo- $\text{C}_2\text{N}_1$ | -1.16                 | 1.23/1.29            | 134.92       |
| 2Ru- $\text{C}_2\text{N}_1$ | -0.88                 | 1.24/1.26            | 136.58       |
| 2Ti- $\text{C}_2\text{N}_1$ | -1.13                 | 1.22/1.28            | 138.267      |
| 3Mn- $\text{C}_2\text{N}_1$ | -1.76                 | 1.28/1.28            | 133.43       |
| 3Mo- $\text{C}_2\text{N}_1$ | -1.56                 | 1.25/1.32            | 127.32       |
| 3Ru- $\text{C}_2\text{N}_1$ | -0.94                 | 1.24/1.26            | 135.28       |
| 3Ti- $\text{C}_2\text{N}_1$ | -1.51                 | 1.23/1.32            | 127.19       |
| 4Mn- $\text{C}_2\text{N}_1$ | -1.61                 | 1.28/1.27            | 134.52       |
| 4Mo- $\text{C}_2\text{N}_1$ | -1.47                 | 1.27/1.27            | 129.91       |
| 4Ru- $\text{C}_2\text{N}_1$ | -2.14                 | 1.28/1.28            | 136.79       |
| 4Ti- $\text{C}_2\text{N}_1$ | -1.44                 | 1.27/1.27            | 130.92       |

**Table S2.** The adsorption energy  $E_{\text{ads}}$  (eV) of  $\text{H}_2\text{O}$  on the TM- $\text{C}_2\text{N}_1$ .

| Models                      | $E_{\text{ads}}$ (eV) |
|-----------------------------|-----------------------|
| Mn- $\text{C}_2\text{N}_1$  | -0.95                 |
| Mo- $\text{C}_2\text{N}_1$  | -0.80                 |
| Ru- $\text{C}_2\text{N}_1$  | -0.57                 |
| Ti- $\text{C}_2\text{N}_1$  | -1.03                 |
| 2Mn- $\text{C}_2\text{N}_1$ | -0.84                 |
| 2Mo- $\text{C}_2\text{N}_1$ | -0.96                 |
| 2Ru- $\text{C}_2\text{N}_1$ | -0.67                 |
| 2Ti- $\text{C}_2\text{N}_1$ | -0.96                 |
| 3Mn- $\text{C}_2\text{N}_1$ | -0.93                 |
| 3Mo- $\text{C}_2\text{N}_1$ | -0.90                 |
| 3Ru- $\text{C}_2\text{N}_1$ | -0.74                 |
| 3Ti- $\text{C}_2\text{N}_1$ | -1.10                 |
| 4Mn- $\text{C}_2\text{N}_1$ | -1.13                 |
| 4Mo- $\text{C}_2\text{N}_1$ | -1.02                 |
| 4Ru- $\text{C}_2\text{N}_1$ | -0.97                 |
| 4Ti- $\text{C}_2\text{N}_1$ | -1.17                 |



**Table S3.** Diffusion coefficient of CO<sub>2</sub> on the TM-C<sub>2</sub>N<sub>1</sub>

| Models                            | CO <sub>2</sub> |
|-----------------------------------|-----------------|
| Mn-C <sub>2</sub> N <sub>1</sub>  | 4.15            |
| Mo-C <sub>2</sub> N <sub>1</sub>  | 4.52            |
| Ru-C <sub>2</sub> N <sub>1</sub>  | 4.27            |
| Ti-C <sub>2</sub> N <sub>1</sub>  | 4.95            |
| 2Mn-C <sub>2</sub> N <sub>1</sub> | 3.87            |
| 2Mo-C <sub>2</sub> N <sub>1</sub> | 5.33            |
| 2Ru-C <sub>2</sub> N <sub>1</sub> | 4.24            |
| 2Ti-C <sub>2</sub> N <sub>1</sub> | 4.22            |
| 3Mn-C <sub>2</sub> N <sub>1</sub> | 2.91            |
| 3Mo-C <sub>2</sub> N <sub>1</sub> | 2.19            |
| 3Ru-C <sub>2</sub> N <sub>1</sub> | 3.86            |
| 3Ti-C <sub>2</sub> N <sub>1</sub> | 2.78            |
| 4Mn-C <sub>2</sub> N <sub>1</sub> | 3.73            |
| 4Mo-C <sub>2</sub> N <sub>1</sub> | 3.89            |
| 4Ru-C <sub>2</sub> N <sub>1</sub> | 3.74            |
| 4Ti-C <sub>2</sub> N <sub>1</sub> | 4.24            |

## References

- [1] B. Delley, From molecules to solids with the DMol<sup>3</sup> approach, *The Journal of Chemical Physics*, 113 (2000) 7756-7764.
- [2] S. Zhuo, Y. Huang, J. Hu, H. Liu, Y. Hu, J. Jiang, Computer Simulation for Adsorption of CO<sub>2</sub>, N<sub>2</sub> and Flue Gas in a Mimetic MCM-41, *The Journal of Physical Chemistry C*, 112 (2008) 11295-11300.
- [3] X. Li, T. Guo, L. Zhu, C. Ling, Q. Xue, W. Xing, Charge-modulated CO<sub>2</sub> capture of C<sub>3</sub>N nanosheet: Insights from DFT calculations, *Chemical Engineering Journal*, 338 (2018) 92-98.
- [4] A.A. Peterson, F. Abild-Pedersen, F. Studt, J. Rossmeisl, J.K. Nørskov, How copper catalyzes the electroreduction of carbon dioxide into hydrocarbon fuels, *Energy & Environmental Science*, 3 (2010) 1311.
- [5] J.K. Nørskov, J. Rossmeisl, A. Logadottir, L. Lindqvist, J.R. Kitchin, T. Bligaard, H. Jónsson, Origin of the Overpotential for Oxygen Reduction at a Fuel-Cell Cathode, *The Journal of Physical Chemistry B*, 108 (2004) 17886-17892.
- [6] H. Yu, D. Wang, Y. Li, G. Chen, X. Ma, Explainable molecular simulation and machine learning for carbon dioxide adsorption on magnesium oxide, *Fuel*, 357 (2024) 129725.
- [7] L. Tao, D. Dastan, W. Wang, P. Poldorn, X. Meng, M. Wu, H. Zhao, H. Zhang, L. Li, B. An, Metal-Decorated InN Monolayer Senses N<sub>2</sub> against CO<sub>2</sub>, *ACS Applied Materials & Interfaces*, 15 (2023) 12534-12544.
- [8] B. Mortazavi, I.S. Novikov, A.V. Shapeev, A machine-learning-based investigation on the mechanical/failure response and thermal conductivity of semiconducting BC<sub>2</sub>N monolayers, *Carbon*, 188 (2022) 431-441.
- [9] L. Tao, J. Huang, X. Yin, Q. Wang, Z. Li, G. Wang, B. Cui, Adsorption Kinetics of CO<sub>2</sub> on a Reconstructed Calcite Surface: An Experiment-Simulation Collaborative Method, *Energy & Fuels*, 33 (2019) 8946-8953.
- [10] A. Einstein, On the movement of small particles suspended in stationary liquids required by the molecular kinetic theory of heat, *Annalen der Physik*, 322 (1905) 549-560.
